# Supplementary material for: Perceiving molecular evolution processes in Escherichia coliby comprehensive metabolite and gene expression profiling
Source: Springer Nature journal article supplement (doi:10.1186/gb-2008-9-4-r72), 2008-04-10
Supplement: 13059_2007_1934_MOESM1_ESM.pdf [file 13059_2007_1934_MOESM1_ESM.pdf]

Identified metabolites of the ancestral and evolved strains by gas chromatography-mass spectrometry. Response ratios of metabolites having  $P$ -Value  $\leq 0.05$  are shown in bold. Metabolites having correlation coefficient  $\geq 0.5$  are underlined. Response ratios of metabolites having  $P$ -Value  $\leq 0.05$  and correlation coefficient  $\geq 0.5$  are shown in bold underline.

| Metabolites                  | MG / MG_Gal | MG / MG_Adip       | MG / MG_AdipGal | MG / MG_stat | MG_Gal / MG_AdipGal | MG_Adip / MG_AdipGal | MG_Adip / MG_stat | DH / DH_Gal | DH / DH_Adip       | DH / DH_AdipGal | DH / DH_stat | DH_Gal / DH_AdipGal | DH_Adip / DH_AdipGal | DH_Adip / DH_stat |
|------------------------------|-------------|--------------------|-----------------|--------------|---------------------|----------------------|-------------------|-------------|--------------------|-----------------|--------------|---------------------|----------------------|-------------------|
| 2-Aminoadipate (260)         | 1.26        | 1.08               | 0.50            | 1.03         | 0.40                | <u>0.46</u>          | 0.96              | 0.78        | 1.56               | 0.99            | 0.59         | 1.27                | <u>0.64</u>          | 0.38              |
| 2-Hydroxyglutarate (203,247) | <u>1.38</u> | <u>0.69</u>        | 0.91            | 1.24         | <b><u>0.66</u></b>  | 1.33                 | <u>1.81</u>       | <u>1.34</u> | <b><u>1.84</u></b> | 1.41            | 1.53         | <u>1.05</u>         | 0.77                 | <u>0.83</u>       |
| 2-Isopropylmalate (275)      | <u>0.99</u> | <u>0.63</u>        | 0.59            | 1.33         | 0.60                | 0.94                 | 2.12              | <u>0.95</u> | <u>0.75</u>        | <b>0.44</b>     | 0.75         | <b>0.47</b>         | 0.59                 | 1.00              |
| 2-Ketoisocaproate (216)      | 1.00        | 0.45               | 0.52            | <u>0.32</u>  | <u>0.52</u>         | <u>1.16</u>          | <u>0.71</u>       | 0.95        | 0.87               | 0.55            | <u>0.67</u>  | <u>0.59</u>         | <u>0.64</u>          | <u>0.77</u>       |
| 2-Methylcitrate (287)        | <u>0.52</u> | 0.54               | 0.53            | 0.99         | 1.03                | 0.99                 | 1.85              | <u>0.35</u> | 0.72               | <b>0.21</b>     | 0.78         | 0.59                | <b>0.28</b>          | 1.08              |
| 2-Methylisocitrate (259)     | <u>3.02</u> | 0.75               | <u>3.02</u>     | 1.21         | <u>1.00</u>         | <b>4.04</b>          | 1.62              | <u>2.64</u> | 0.69               | <u>1.25</u>     | 0.53         | <u>0.47</u>         | 1.80                 | 0.77              |
| 4-Aminobutyrate (174)        | 2.29        | <u>1.44</u>        | <u>2.60</u>     | 0.96         | 1.14                | <b>1.81</b>          | 0.66              | <b>2.62</b> | <u>0.44</u>        | <b>2.94</b>     | 0.83         | 1.12                | <b>6.61</b>          | 1.87              |
| 5-Methyl-thioadenosine (236) | <u>0.72</u> | <b><u>0.43</u></b> | <b>0.57</b>     | 0.78         | 0.79                | 1.33                 | 1.82              | <u>1.36</u> | <b><u>0.68</u></b> | 1.16            | 1.13         | 0.85                | <b>1.69</b>          | <b>1.66</b>       |
| Adenine (264)                | 0.71        | <b>0.47</b>        | 0.66            | 0.41         | 0.92                | 1.40                 | 0.88              | 1.22        | <b>0.53</b>        | 0.92            | 0.76         | 0.75                | <b>1.75</b>          | 1.44              |
| Adenosine (236)              | 1.10        | <u>1.05</u>        | 1.50            | 2.09         | 1.36                | 1.42                 | 1.99              | 0.84        | <u>1.35</u>        | 2.70            | 1.06         | 3.20                | 1.99                 | 0.78              |
| a-Glycerophosphate (357)     | 0.97        | 0.66               | 0.85            | 0.55         | 0.88                | <u>1.30</u>          | 0.84              | 0.99        | <b>0.67</b>        | 0.99            | 0.91         | 1.00                | <b>1.49</b>          | <b>1.36</b>       |
| a-Ketoglutarate (198)        | 0.54        | <u>0.20</u>        | <u>0.73</u>     | 0.15         | <u>1.34</u>         | 3.65                 | 0.78              | 1.41        | <b><u>0.19</u></b> | <u>2.03</u>     | <b>0.26</b>  | <u>1.45</u>         | <b>10.94</b>         | 1.41              |
| Alanine (116)                | 0.67        | 0.55               | 0.73            | 0.54         | <u>1.08</u>         | 1.33                 | 1.00              | 1.58        | <b>0.51</b>        | 1.01            | 0.89         | <u>0.64</u>         | <b>1.96</b>          | <b>1.73</b>       |
| Arabinose (217)              | 1.42        | <u>1.04</u>        | 0.83            | <b>1.57</b>  | <b>0.59</b>         | 0.80                 | 1.51              | 1.13        | <u>1.74</u>        | 1.56            | 1.37         | 1.38                | 0.90                 | 0.79              |
| Arginine (256)               | 1.58        | 0.52               | 0.92            | 0.76         | 0.58                | 1.75                 | 1.45              | <b>1.58</b> | 0.69               | 1.21            | 1.10         | 0.77                | 1.76                 | 1.59              |
| Asparagine (216)             | 0.65        | <b>0.33</b>        | 0.53            | <b>0.41</b>  | 0.83                | 1.62                 | 1.25              | 1.16        | <b>0.37</b>        | 0.66            | 0.81         | 0.57                | 1.79                 | 2.19              |
| b-Alanine (248)              | 1.80        | <u>0.81</u>        | 1.13            | 1.39         | 0.63                | 1.39                 | 1.71              | 1.01        | <u>1.08</u>        | 1.23            | 1.23         | 1.21                | 1.13                 | 1.13              |
| Citrate (257)                | 1.06        | <u>0.52</u>        | <b>0.62</b>     | 1.25         | <b><u>0.59</u></b>  | <u>1.20</u>          | <b>2.41</b>       | 1.24        | <u>1.01</u>        | 1.11            | 0.77         | <u>0.89</u>         | <u>1.10</u>          | 0.76              |
| Cystathionine (128)          | 0.91        | <b>0.19</b>        | <u>0.28</u>     | 0.61         | <u>0.31</u>         | 1.44                 | <b>3.17</b>       | 0.87        | 0.35               | <u>0.54</u>     | 1.41         | <u>0.62</u>         | 1.54                 | 4.07              |
| DHAP (400)                   | 0.88        | <u>0.75</u>        | 0.87            | 0.82         | 0.98                | 1.16                 | <u>1.09</u>       | 1.70        | <u>0.51</u>        | 1.98            | 0.83         | 1.16                | 3.91                 | <u>1.65</u>       |
| Diaminopimelate (200,272)    | 1.33        | 0.57               | <u>1.03</u>     | 0.47         | <u>0.77</u>         | 1.81                 | 0.83              | 1.13        | 1.01               | <u>1.62</u>     | 1.50         | <u>1.43</u>         | 1.60                 | 1.48              |
| Erythrose-4-P (357)          | 3.04        | 4.45               | <u>3.45</u>     | 4.83         | 1.13                | 0.78                 | <u>1.09</u>       | 0.17        | 1.85               | <u>0.80</u>     | 2.48         | 4.84                | 0.43                 | <u>1.34</u>       |
| Fructose-6-P (315)           | 0.75        | <u>0.86</u>        | 0.61            | <u>0.81</u>  | 0.82                | 0.71                 | 0.94              | 0.91        | <b>0.38</b>        | 0.81            | <b>0.56</b>  | 0.89                | <b>2.15</b>          | 1.49              |
| Fructose (307)               | <b>0.66</b> | 1.01               | <b>0.53</b>     | 1.31         | 0.81                | <b>0.52</b>          | 1.30              | <b>0.45</b> | 0.62               | <b>0.46</b>     | 0.93         | 1.01                | 0.73                 | 1.49              |

Identified metabolites of the ancestral and evolved strains by gas chromatography-mass spectrometry.

|                             |             |             |              |             |             |             |             |             |              |              |             |              |             |             |
|-----------------------------|-------------|-------------|--------------|-------------|-------------|-------------|-------------|-------------|--------------|--------------|-------------|--------------|-------------|-------------|
| Fumarate (245)              | <u>2.38</u> | <u>0.75</u> | 1.98         | 0.47        | <u>0.83</u> | <u>2.64</u> | 0.63        | <u>2.58</u> | <u>0.51</u>  | 3.68         | 0.88        | <u>1.43</u>  | <u>7.28</u> | 1.74        |
| Gluconate-6-P (387)         | 1.20        | 1.02        | 0.91         | 1.06        | <u>0.76</u> | 0.89        | 1.03        | 0.89        | 1.28         | 0.90         | 1.51        | <u>1.01</u>  | 0.71        | 1.18        |
| Gluconate (333)             | 3.22        | <u>1.24</u> | 2.32         | 1.21        | 0.72        | 1.87        | 0.98        | 1.09        | <u>1.18</u>  | 1.97         | 1.63        | 1.81         | 1.67        | 1.38        |
| Glucose (319)               | 1.47        | <u>2.03</u> | <u>0.35</u>  | <u>0.55</u> | 0.24        | 0.17        | <u>0.27</u> | 0.85        | <u>0.70</u>  | <u>0.70</u>  | <u>0.80</u> | 0.82         | 0.99        | <u>1.13</u> |
| Glucose-6-P (387)           | 0.77        | <u>0.74</u> | 0.68         | <u>1.13</u> | <u>0.88</u> | 0.91        | <u>1.52</u> | 0.86        | <u>0.56</u>  | 0.74         | <u>0.62</u> | <u>0.86</u>  | 1.30        | <u>1.10</u> |
| Glucuronicacid (333)        | 1.12        | 0.17        | 0.71         | 1.71        | 0.63        | 4.09        | 9.83        | 3.07        | 1.99         | 3.04         | 1.43        | 0.99         | 1.53        | 0.72        |
| Glutamate (230,246)         | 0.90        | <u>0.50</u> | 0.71         | <u>0.58</u> | 0.79        | 1.42        | 1.17        | 1.70        | <b>0.55</b>  | 1.18         | <u>0.95</u> | 0.69         | <b>2.12</b> | <b>1.71</b> |
| Glutamine (155)             | 0.93        | <u>0.91</u> | <u>0.90</u>  | <u>0.72</u> | <u>0.98</u> | 0.99        | 0.79        | 1.34        | <u>0.92</u>  | <u>1.18</u>  | <u>1.07</u> | <u>0.88</u>  | 1.29        | 1.16        |
| Glycerate-2-P (299,315,459) | 1.00        | <b>0.58</b> | 0.68         | 0.62        | <u>0.68</u> | 1.16        | 1.06        | 1.12        | <b>0.65</b>  | 1.13         | 0.99        | <u>1.02</u>  | <b>1.74</b> | <b>1.52</b> |
| Glycerate (189,192)         | 1.56        | 1.17        | 1.20         | 0.91        | 0.77        | <u>1.03</u> | 0.78        | 1.36        | 0.66         | 0.99         | 0.76        | 0.73         | <u>1.48</u> | 1.14        |
| Glycerate-3-P (227,299,459) | 1.29        | 1.04        | 1.35         | 1.33        | 1.05        | 1.30        | 1.28        | 1.17        | 0.98         | 0.76         | 0.56        | 0.65         | 0.77        | 0.57        |
| Glycine (174)               | 1.30        | 0.72        | 1.00         | 0.68        | <u>0.77</u> | <u>1.39</u> | 0.95        | 0.94        | 0.63         | 1.10         | 0.95        | <u>1.17</u>  | <b>1.74</b> | 1.50        |
| Isocitrate (245,319)        | <u>1.00</u> | <u>0.53</u> | 0.64         | 1.15        | <b>0.64</b> | <u>1.20</u> | <b>2.18</b> | <u>0.86</u> | <u>1.04</u>  | 1.10         | 0.89        | 1.29         | <u>1.07</u> | 0.86        |
| Isoleucine (158)            | <u>2.12</u> | 0.90        | 1.15         | 0.92        | 0.54        | 1.28        | 1.02        | <u>1.02</u> | 0.51         | 1.36         | 0.87        | 1.33         | <b>2.67</b> | 1.70        |
| L,L-Cystathionine (218)     | <b>0.38</b> | <b>0.39</b> | <b>0.37</b>  | 0.65        | 0.96        | <u>0.93</u> | 1.66        | 0.59        | 0.92         | <u>0.46</u>  | 0.66        | 0.78         | <u>0.50</u> | 0.71        |
| Lactate (191)               | <u>1.03</u> | 0.80        | <u>0.66</u>  | 0.54        | <u>0.64</u> | <u>0.83</u> | 0.67        | <u>1.01</u> | <b>0.61</b>  | <u>0.89</u>  | 0.93        | <u>0.88</u>  | <u>1.46</u> | <b>1.52</b> |
| L-Aspartate (232)           | 0.93        | 1.05        | 0.95         | 0.85        | 1.02        | 0.90        | 0.81        | 1.26        | 0.75         | 1.08         | 0.90        | 0.85         | 1.44        | 1.20        |
| L-Cysteine (220)            | 1.28        | 0.71        | <b>0.54</b>  | 1.40        | <b>0.42</b> | 0.76        | 1.99        | 0.97        | 1.02         | 0.95         | 1.54        | 0.97         | 0.93        | 1.50        |
| Leucine (158)               | <u>0.72</u> | 0.82        | 1.01         | <u>0.25</u> | 1.41        | 1.23        | <u>0.31</u> | <u>0.86</u> | <b>0.07</b>  | 0.37         | <u>0.20</u> | 0.43         | <b>5.37</b> | <b>2.93</b> |
| L-Homocysteine (234)        | 1.39        | 0.54        | <u>0.60</u>  | 1.02        | 0.43        | 1.11        | 1.90        | 0.59        | 1.15         | <u>0.74</u>  | 1.47        | 1.24         | 0.64        | 1.28        |
| L-Homoserine (218)          | <u>3.62</u> | 1.27        | <u>2.12</u>  | 0.52        | 0.59        | 1.68        | 0.41        | <u>0.58</u> | 2.69         | <u>5.84</u>  | 2.72        | <b>10.00</b> | 2.17        | 1.01        |
| Lysine (156)                | 0.50        | 0.36        | 0.37         | 1.43        | 0.73        | 1.01        | 3.95        | 2.69        | <b>0.36</b>  | 0.84         | 1.20        | 0.31         | <b>2.30</b> | <b>3.28</b> |
| Malate (245,307)            | <u>1.21</u> | <b>0.51</b> | 0.91         | 0.43        | <u>0.75</u> | <b>1.78</b> | 0.85        | <u>1.92</u> | <b>0.45</b>  | 1.33         | 0.71        | <u>0.69</u>  | <b>2.94</b> | 1.56        |
| Maleicacid (245)            | <u>0.24</u> | ND          | <u>0.51</u>  | ND          | <u>2.12</u> | 0.00        | ND          | <u>1.27</u> | ND           | <u>1.37</u>  | ND          | <u>1.08</u>  | 0.00        | ND          |
| Methionine (176)            | 0.90        | <b>0.49</b> | <b>0.58</b>  | 0.51        | <b>0.64</b> | <u>1.18</u> | 1.03        | 1.06        | <b>0.58</b>  | 0.86         | 0.87        | <u>0.81</u>  | <u>1.49</u> | <b>1.51</b> |
| myo-Inositol (305)          | 1.01        | 0.67        | <u>1.53</u>  | 0.87        | 1.52        | 2.29        | 1.31        | 2.73        | 4.60         | <u>6.82</u>  | 4.52        | 2.49         | 1.48        | 0.98        |
| Myo-Inositol-P (318)        | 1.08        | 1.13        | 1.20         | 1.28        | 1.11        | 1.06        | 1.13        | 0.40        | 0.74         | 1.85         | 0.67        | <b>4.66</b>  | 2.52        | 0.92        |
| N-Acetyl-Aspartate (274)    | <b>2.31</b> | <b>3.71</b> | <b>11.68</b> | 0.57        | <b>5.05</b> | <b>3.15</b> | <b>0.15</b> | <b>4.82</b> | <b>19.18</b> | <b>61.43</b> | 1.11        | <b>12.73</b> | <b>3.20</b> | <b>0.06</b> |
| N-Acetyl-L-Serine (261)     | 3.06        | <u>1.02</u> | 0.89         | 2.48        | <b>0.29</b> | <u>0.87</u> | 2.42        | 1.20        | <u>1.47</u>  | 1.18         | 1.25        | 0.98         | <u>0.80</u> | 0.85        |
| o-acetyl-L-Homoserine (202) | 1.69        | <u>0.83</u> | <u>0.56</u>  | 0.45        | <u>0.33</u> | 0.68        | 0.54        | 1.15        | <u>0.90</u>  | <u>1.08</u>  | 1.29        | <u>0.94</u>  | 1.20        | 1.44        |
| o-acetyl-L-Serine (132)     | 1.55        | 0.72        | ND           | <u>6.55</u> | ND          | ND          | <u>9.07</u> | 3.39        | 1.28         | 1.21         | <u>0.97</u> | 0.36         | 0.95        | <u>0.76</u> |
| Ornithine (142)             | 1.03        | <b>0.48</b> | 0.68         | 0.55        | <u>0.66</u> | <u>1.40</u> | 1.15        | 1.06        | <u>0.73</u>  | 1.06         | 0.90        | <u>1.00</u>  | <u>1.45</u> | 1.24        |
| Oroticacid (254)            | 1.84        | <u>2.75</u> | 5.63         | 1.29        | <u>3.06</u> | <u>2.04</u> | 0.47        | 1.96        | <b>31.00</b> | <b>88.75</b> | 1.25        | <b>45.22</b> | <b>2.86</b> | <b>0.04</b> |
| Panhotenic acid (201)       | 2.28        | 1.11        | 0.97         | <u>1.43</u> | <b>0.42</b> | 0.87        | <u>1.29</u> | 2.35        | 0.93         | 1.10         | <u>1.11</u> | <b>0.47</b>  | 1.18        | <u>1.19</u> |
| PEP (369)                   | 6.36        | 1.34        | 0.48         | ND          | 0.08        | 0.36        | ND          | 1.15        | 0.53         | 2.14         | 0.25        | 1.86         | 4.05        | 0.47        |

Identified metabolites of the ancestral and evolved strains by gas chromatography-mass spectrometry.

|                      |               |             |               |             |             |               |             |               |              |               |             |             |              |             |
|----------------------|---------------|-------------|---------------|-------------|-------------|---------------|-------------|---------------|--------------|---------------|-------------|-------------|--------------|-------------|
| Phenylalanine (192)  | 2.46          | <u>1.10</u> | 2.30          | 1.88        | 0.94        | 2.09          | 1.70        | 1.31          | <u>1.21</u>  | 2.20          | 1.88        | 1.68        | 1.82         | 1.56        |
| Phosphate19.28 (299) | 0.94          | 0.45        | 0.51          | 5.95        | 0.54        | 1.14          | 13.29       | 0.75          | <b>14.23</b> | 1.22          | 4.38        | 1.64        | 0.09         | 0.31        |
| Proline (142)        | 1.27          | <u>0.53</u> | 1.28          | <u>0.63</u> | <u>1.01</u> | <b>2.41</b>   | 1.18        | 1.71          | <u>0.62</u>  | 1.41          | <u>1.27</u> | <u>0.83</u> | <b>2.28</b>  | <b>2.06</b> |
| Putrescine (142,174) | 0.33          | <b>0.41</b> | <b>0.43</b>   | 0.38        | 1.30        | 1.04          | 0.92        | 0.70          | 0.95         | 0.91          | 1.12        | 1.29        | 0.95         | 1.17        |
| Pyruvate (174)       | 1.05          | <b>0.47</b> | 0.82          | 0.33        | 0.78        | 1.74          | 0.69        | 1.19          | 0.87         | 1.84          | 0.87        | 1.55        | <b>2.11</b>  | 0.99        |
| Ribitol              | 0.86          | 0.76        | 0.91          | 0.66        | <u>1.06</u> | <u>1.19</u>   | 0.86        | 0.94          | 0.78         | 0.90          | 0.94        | <u>0.96</u> | <u>1.15</u>  | 1.20        |
| Ribose (217)         | <u>0.69</u>   | <b>0.39</b> | <b>0.47</b>   | 1.08        | 0.68        | 1.21          | <b>2.80</b> | <u>0.86</u>   | <u>0.42</u>  | 0.90          | 1.05        | 1.05        | 2.14         | 2.49        |
| Ribose-5-P (315,299) | 1.04          | <b>0.55</b> | 0.69          | 0.80        | 0.66        | 1.24          | 1.44        | 1.08          | 0.68         | 1.13          | 0.86        | 1.04        | 1.65         | 1.26        |
| Salicylicacid (267)  | 1.03          | <b>0.43</b> | 0.72          | 0.40        | 0.70        | <u>1.67</u>   | 0.92        | 1.51          | <b>0.48</b>  | 1.21          | 0.57        | 0.80        | <b>2.55</b>  | 1.19        |
| Serine (204)         | 1.22          | 0.65        | 0.92          | 0.53        | <u>0.75</u> | 1.41          | 0.81        | 1.45          | 0.84         | 1.26          | 1.20        | <u>0.87</u> | 1.50         | 1.42        |
| Shikimate (204)      | 0.42          | 0.51        | <b>0.38</b>   | 0.11        | <u>0.91</u> | <u>0.75</u>   | 0.22        | 0.52          | 0.55         | 0.37          | 0.11        | <u>0.72</u> | <u>0.68</u>  | 0.21        |
| Spermidine (144)     | 1.05          | 0.67        | <b>0.60</b>   | 0.93        | 0.58        | 0.90          | 1.39        | 0.83          | 0.94         | 0.93          | 0.92        | 1.12        | 0.99         | 0.98        |
| Spermine (144)       | 0.93          | 0.81        | <u>1.01</u>   | 1.10        | <u>1.09</u> | 1.25          | 1.36        | 1.24          | 1.15         | <u>0.90</u>   | 0.88        | <u>0.72</u> | 0.78         | 0.77        |
| Succinate (247,409)  | 0.97          | <u>0.45</u> | 0.97          | 0.85        | <u>1.01</u> | <u>2.17</u>   | 1.89        | 1.72          | <u>0.64</u>  | 1.31          | 1.08        | <u>0.76</u> | <b>2.03</b>  | 1.68        |
| Sucrose (361)        | 0.85          | 0.71        | 0.78          | 0.78        | <u>0.92</u> | 1.10          | 1.10        | 1.06          | 0.77         | 0.89          | 0.77        | <u>0.84</u> | 1.15         | 1.00        |
| Threonine (101)      | <b>2.97</b>   | <u>0.92</u> | <u>1.62</u>   | 0.71        | <u>0.54</u> | 1.75          | 0.77        | <u>0.60</u>   | <u>0.70</u>  | <u>4.26</u>   | 2.33        | <b>7.12</b> | 6.07         | 3.32        |
| Thymine (255)        | <b>0.53</b>   | <u>0.63</u> | 0.66          | <u>0.47</u> | <u>1.23</u> | 1.03          | 0.74        | <b>0.67</b>   | <b>0.36</b>  | <b>0.55</b>   | <b>0.69</b> | <u>0.82</u> | <u>1.51</u>  | <b>1.91</b> |
| Trehalose (361)      | <b>2.39</b>   | <b>2.00</b> | <b>6.63</b>   | 0.59        | 2.77        | <b>3.32</b>   | <b>0.29</b> | <b>2.01</b>   | 0.85         | <b>3.97</b>   | <b>0.53</b> | 1.98        | <u>4.69</u>  | 0.63        |
| Tryptophan (202)     | 0.77          | 0.71        | 0.82          | 0.67        | <u>1.05</u> | 1.14          | 0.94        | 0.72          | 0.65         | 0.56          | 0.67        | <u>0.77</u> | 0.86         | 1.04        |
| Tyrosine (218)       | 1.46          | 1.05        | <u>0.69</u>   | 1.67        | 0.47        | 0.66          | 1.59        | 0.92          | 3.58         | <u>0.62</u>   | 1.03        | 0.67        | 0.17         | 0.29        |
| Unknown14.80 (228)   | 1.09          | 0.73        | 0.82          | 0.26        | 0.75        | <u>1.12</u>   | 0.36        | 1.09          | <b>0.32</b>  | 1.44          | 0.66        | 1.31        | <b>4.46</b>  | <b>2.06</b> |
| Unknown32.96 (361)   | <b>183.88</b> | <u>1.32</u> | <b>231.43</b> | 1.88        | <u>1.26</u> | <b>175.44</b> | 1.42        | <b>196.78</b> | <b>4.59</b>  | <b>255.29</b> | 1.43        | <u>1.30</u> | <b>55.62</b> | 0.31        |
| Uracil (255,241)     | 1.09          | <b>0.46</b> | 1.03          | 0.70        | <u>0.95</u> | <b>2.24</b>   | 1.50        | 1.42          | <b>0.49</b>  | <b>1.88</b>   | 1.11        | <u>1.33</u> | <b>3.83</b>  | <b>2.27</b> |
| Urea (189)           | 0.60          | 0.06        | <u>0.17</u>   | 0.06        | <u>0.29</u> | 2.81          | 0.99        | 1.43          | 0.30         | <u>0.25</u>   | 0.44        | <u>0.18</u> | 0.84         | 1.46        |
| Valine (144)         | 0.36          | 0.66        | <b>0.53</b>   | 0.53        | <u>1.47</u> | 0.80          | 0.81        | 0.99          | <b>0.54</b>  | <b>0.44</b>   | 0.64        | <b>0.44</b> | 0.81         | 1.19        |



|
