# Supplementary material for: Perceiving molecular evolution processes in Escherichia coliby comprehensive metabolite and gene expression profiling
Source: Springer Nature journal article supplement (doi:10.1186/gb-2008-9-4-r72), 2008-04-10
Supplement: 13059_2007_1934_MOESM2_ESM.pdf [file 13059_2007_1934_MOESM2_ESM.pdf]

| <b>Significantly changed metabolites (SAM score (<i>d</i>) ≥ 1.0 (or) ≤ -1.0) in excess-nutrient adaptive evolutionary condition.</b> |                   |             |                                                             |                   |             |
|---------------------------------------------------------------------------------------------------------------------------------------|-------------------|-------------|-------------------------------------------------------------|-------------------|-------------|
| Over abundant metabolites in both the lines (MGAdp & DHAdp)                                                                           |                   |             | Less abundant metabolites in both the lines (MGAdp & DHAdp) |                   |             |
| Metabolites                                                                                                                           | Score( <i>d</i> ) | Fold Change | Metabolites                                                 | Score( <i>d</i> ) | Fold Change |
| 5-Methyl-thioadenosine (236)                                                                                                          | 3.16              | 2.35        | Erythrose-4-P (357)                                         | -1.27             | 0.22        |
| Adenine (264)                                                                                                                         | 3.70              | 2.12        | N-Acetyl_Aspartate (274)                                    | -4.65             | 0.27        |
| α-Glycerophosphate (357)                                                                                                              | 2.21              | 1.53        | Oroticacid (254)                                            | -1.80             | 0.36        |
| α-Ketoglutarate(198)                                                                                                                  | 1.57              | 5.03        | Unknown30.70 (217)                                          | -1.22             | 0.52        |
| Alanine (116)                                                                                                                         | 2.17              | 1.83        |                                                             |                   |             |
| Arginine (256)                                                                                                                        | 2.22              | 1.91        |                                                             |                   |             |
| Asparagine (216)                                                                                                                      | 2.55              | 3.03        |                                                             |                   |             |
| Cystathionine (128)                                                                                                                   | 5.56              | 5.16        |                                                             |                   |             |
| Glucose-6-P (387)                                                                                                                     | 1.44              | 1.34        |                                                             |                   |             |
| Glutamate (230,246)                                                                                                                   | 2.31              | 2.01        |                                                             |                   |             |
| Glycerate-2-P (299,315,459)                                                                                                           | 2.81              | 1.72        |                                                             |                   |             |
| Glycine (174)                                                                                                                         | 1.25              | 1.39        |                                                             |                   |             |
| Lysine (156)                                                                                                                          | 1.42              | 2.77        |                                                             |                   |             |
| Malate (245,307)                                                                                                                      | 3.33              | 1.96        |                                                             |                   |             |
| Methionine (176)                                                                                                                      | 3.17              | 2.03        |                                                             |                   |             |
| o-acetyl_L_Homoserin3 (128)                                                                                                           | 1.50              | 1.41        |                                                             |                   |             |
| Ornithine (142)                                                                                                                       | 3.91              | 2.08        |                                                             |                   |             |
| Proline (142)                                                                                                                         | 1.75              | 1.88        |                                                             |                   |             |
| Ribose (217)                                                                                                                          | 4.78              | 2.60        |                                                             |                   |             |
| Ribose-5-P (315,299)                                                                                                                  | 2.77              | 1.81        |                                                             |                   |             |
| Salicylicacid (267)                                                                                                                   | 2.34              | 2.31        |                                                             |                   |             |
| Succinate (247,409)                                                                                                                   | 1.96              | 2.22        |                                                             |                   |             |
| Thymine (255)                                                                                                                         | 2.08              | 1.57        |                                                             |                   |             |
| Tryptophane (202)                                                                                                                     | 1.97              | 1.40        |                                                             |                   |             |
| Uracil (255,241)                                                                                                                      | 3.32              | 2.16        |                                                             |                   |             |
| Urea (189)                                                                                                                            | 1.14              | 16.14       |                                                             |                   |             |
| Valine (144)                                                                                                                          | 1.35              | 1.52        |                                                             |                   |             |

| <b>Significantly changed metabolites (SAM score (<i>d</i>) ≥ 1.0 (or) ≤ -1.0) in environmental shift evolutionary condition.</b> |                   |             |                                                                   |                   |             |
|----------------------------------------------------------------------------------------------------------------------------------|-------------------|-------------|-------------------------------------------------------------------|-------------------|-------------|
| Over abundant metabolites in both the lines (MGAdpGal & DHAdpGal)                                                                |                   |             | Less abundant metabolites in both the lines (MGAdpGal & DHAdpGal) |                   |             |
| Metabolites                                                                                                                      | Score( <i>d</i> ) | Fold Change | Metabolites                                                       | Score( <i>d</i> ) | Fold Change |
| 2-Isopropylmalate (275)                                                                                                          | 2.01              | 1.68        | N-Acetyl_Aspartate (274)                                          | -2.52             | 0.20        |
| Agmatine (347)                                                                                                                   | 2.13              | 1.60        | Trehalose (361)                                                   | -1.90             | 0.36        |
| Cystathionine (128)                                                                                                              | 2.25              | 3.23        | Oroticacid (254)                                                  | -1.89             | 0.33        |
| Malate (245,307)                                                                                                                 | 1.41              | 1.34        |                                                                   |                   |             |
| Panhotenic_acid (201)                                                                                                            | 3.10              | 2.35        |                                                                   |                   |             |
| Putrescine (174)                                                                                                                 | 2.27              | 1.79        |                                                                   |                   |             |
| Urea (189)                                                                                                                       | 0.98              | 3.43        |                                                                   |                   |             |

**Significantly changed metabolites (SAM score (*d*) ≥ 1.0 (or) ≤ -1.0) in prolonged stationary phase evolutionary condition.**

| Over abundant metabolites in both the lines (MGStat & DHStat) |                   |             | Less abundant metabolites in both the lines (MGStat & DHStat) |                   |             |
|---------------------------------------------------------------|-------------------|-------------|---------------------------------------------------------------|-------------------|-------------|
| Metabolites                                                   | Score( <i>d</i> ) | Fold Change | Metabolites                                                   | Score( <i>d</i> ) | Fold Change |
| Adenine (264)                                                 | 1.76              | 2.42        | Arabinose (217)                                               | -1.74             | 0.64        |
| α-Ketoglutarate (198)                                         | 1.62              | 6.46        | Erythrose-4-P (357)                                           | -1.30             | 0.21        |
| Leucine (158)                                                 | 1.64              | 3.93        | Phenylalanine (192)                                           | -1.02             | 0.53        |
| Malate (245,307)                                              | 2.04              | 2.31        | phosphate19.28 (299)                                          | -2.22             | 0.17        |
| Proline (142)                                                 | 1.52              | 2.88        | Trehalose (361)                                               | -1.73             | 0.48        |
| Salicylicacid (267)                                           | 1.76              | 2.50        | Unknown32.96 (361)                                            | -1.41             | 0.53        |
| Shikimate (204)                                               | 1.00              | 8.82        | Unknown44.66 (325)                                            | -1.68             | 0.30        |
| Thymine (255)                                                 | 1.73              | 2.12        |                                                               |                   |             |
| Trehalose (361)                                               | 1.74              | 1.71        |                                                               |                   |             |
| Tryptophan (202)                                              | 1.17              | 1.50        |                                                               |                   |             |
| Urea (189)                                                    | 1.15              | 16.34       |                                                               |                   |             |
| Valine (144)                                                  | 1.60              | 1.88        |                                                               |                   |             |
