# Supplementary material for: Perceiving molecular evolution processes in Escherichia coliby comprehensive metabolite and gene expression profiling
Source: Springer Nature journal article supplement (doi:10.1186/gb-2008-9-4-r72), 2008-04-10
Supplement: 13059_2007_1934_MOESM3_ESM.pdf [file 13059_2007_1934_MOESM3_ESM.pdf]

**A) Significantly expressed genes (SAM score (*d*) ≥ 1.0 (or) ≤ -1.0) in excess-nutrient adaptive evolutionary condition.**

Positive significant genes (SAM score (*d*) ≥ 1.0), i.e. over-expressed genes in both the excess-nutrient evolved lines (MGAdp and DHAdp).

| B Number | Gene Name | Function                                                                                                      | Score ( <i>d</i> ) | Fold Change |
|----------|-----------|---------------------------------------------------------------------------------------------------------------|--------------------|-------------|
| B0012    | htgA      | htgA,transcriptional activator for sigma H (sigma 32) promoters, permitting growth at high temperature        | 1.46               | 1.09        |
| B0101    | yacG      | yacG,conserved hypothetical protein                                                                           | 2.15               | 1.37        |
| B0104    | guaC      | guaC,GMP reductase                                                                                            | 1.05               | 1.37        |
| B0135    | yadC      | yadC,putative fimbrial-like adhesin protein                                                                   | 1.00               | 2.15        |
| B0178    | hlpA      | hlpA,periplasmic molecular chaperone for outer membrane proteins                                              | 1.19               | 1.93        |
| B0249    | ykfF      | ykfF,CP4-6 prophage                                                                                           | 0.98               | 1.18        |
| B0293    | yagZ      | yagZ,conserved hypothetical protein                                                                           | 1.49               | 1.38        |
| B0475    | hemH      | hemH,ferrochelatae                                                                                            | 1.26               | 1.40        |
| B0528    | ybcJ      | ybcJ,putative RNA-binding protein                                                                             | 1.03               | 1.40        |
| B0553    | nmpC      | nmpC,DLP12 prophage; outer membrane porin, at locus of qsr prophage                                           | 0.96               | 1.21        |
| B0564    | appY      | appY,DLP12 prophage; transcriptional regulator required for anaerobic and stationary phase induction of genes | 0.99               | 1.20        |
| B0571    | cusR      | cusR,response regulator in two-component regulatory system with CusS, regulation of copper resistance         | 2.03               | 1.15        |
| B0603    | ybdO      | ybdO,putative transcriptional regulator with periplasmic binding protein domain (LysR family)                 | 0.98               | 1.50        |
| B0649    | ybeV      | ybeV,putative chaperone with dnaJ-like domain                                                                 | 1.82               | 1.36        |
| B0687    | seqA      | seqA,negative modulator of replication initiation                                                             | 0.99               | 1.52        |
| B0723    | sdhA      | sdhA,succinate dehydrogenase, catalytic and NAD/flavoprotein subunit                                          | 1.13               | 1.19        |
| B0732    | ybgG      | ybgG,putative sugar hydrolase with alpha-mannosidase domain                                                   | 1.27               | 1.77        |
| B0823    | pflF      | pflF,putative pyruvate formate lyase                                                                          | 4.06               | 1.46        |
| B0851    | nfsA      | nfsA,oxygen-insensitive NADPH nitroreductase, also anaerobic azo reductase                                    | 1.46               | 1.52        |
| B0856    | potH      | potH,putrescine transport protein (ABC superfamily, membrane)                                                 | 2.84               | 2.08        |
| B0904    | focA      | focA,formate transport protein (formate channel 1) (FNT family)                                               | 0.98               | 1.54        |
| B0906    | ycaP      | ycaP,conserved hypothetical protein                                                                           | 1.43               | 1.63        |
| B0958    | sulA      | sulA,Suppressor of lon; inhibitor of cell division and FtsZ ring formation upon DNA damage/inhibition         | 1.11               | 1.31        |
| B0996    | torC      | torC,cytochrome c-type protein in TMAO respiration; with TorA, also negative regulator of tor operon          | 1.19               | 1.15        |
| B1006    | ycdG      | ycdG,putative uracil transport protein (NCS2 family)                                                          | 1.22               | 1.36        |
| B1046    | ymdC      | ymdC,putative synthase with phospholipase D/nuclease domain                                                   | 1.97               | 1.31        |
| B1110    | ycfJ      | ycfJ,putative membrane protein                                                                                | 1.12               | 1.23        |
| B1114    | mfd       | mfd,transcription-repair ATP-dependent coupling factor                                                        | 2.49               | 1.29        |

|       |       |                                                                                                            |      |      |
|-------|-------|------------------------------------------------------------------------------------------------------------|------|------|
| B1173 | b1173 | b1173,unknown CDS                                                                                          | 1.72 | 1.26 |
| B1183 | umuD  | umuD,component of DNA polymerase V, signal peptidase with UmuC                                             | 1.43 | 1.66 |
| B1185 | dsbB  | dsbB,disulfide bond formation proteins (oxidoreductase) with quinone as electron acceptor, reoxidizes DsbA | 0.99 | 1.46 |
| B1194 | ycgR  | ycgR,putative regulator (TetR/AcrR family)                                                                 | 1.86 | 1.24 |
| B1216 | chaA  | chaA,sodium/calcium:proton antiporter (CaCA family)                                                        | 1.29 | 1.21 |
| B1354 | b1354 | b1354,Rac prophage                                                                                         | 2.23 | 1.33 |
| B1372 | stfR  | stfR,Rac prophage; putative tail fiber protein                                                             | 1.04 | 1.22 |
| B1382 | ynbE  | ynbE,unknown CDS                                                                                           | 1.40 | 1.33 |
| B1483 | ddpF  | ddpF,putative dipeptide transport protein (ABC superfamily, atp_bind)                                      | 1.95 | 1.36 |
| B1501 | ydeP  | ydeP,putative formate dehydrogenase, related to acid resistance with formate dehydrogenase/DMSO reductase  | 1.42 | 1.26 |
| B1535 | ydeH  | ydeH,conserved protein                                                                                     | 1.89 | 2.45 |
| B1586 | ynfD  | ynfD,conserved hypothetical protein                                                                        | 1.05 | 1.14 |
| B1600 | ydgF  | ydgF,multidrug transport protein (SMR superfamily)                                                         | 1.57 | 1.22 |
| B1601 | b1601 | b1601,putative integral membrane transport protein                                                         | 0.99 | 1.22 |
| B1650 | nemA  | nemA,N-ethylmaleimide reductase, FMN-linked                                                                | 2.03 | 1.25 |
| B1687 | ydiJ  | ydiJ,putative oxidase, with FAD-binding domains                                                            | 1.70 | 1.30 |
| B1689 | ydiL  | ydiL,conserved hypothetical protein                                                                        | 1.60 | 1.39 |
| B1693 | aroD  | aroD,3-dehydroquinate dehydratase                                                                          | 1.25 | 1.33 |
| B1713 | pheT  | pheT,phenylalanine tRNA synthetase, beta-subunit                                                           | 4.92 | 1.31 |
| B1747 | astA  | astA,arginine succinyltransferase                                                                          | 1.29 | 1.21 |
| B1750 | ydjX  | ydjX,putative membrane protein                                                                             | 2.92 | 1.30 |
| B1879 | flhA  | flhA,putative export protein for flagellar biosynthesis                                                    | 1.02 | 1.28 |
| B1882 | cheY  | cheY,chemotactic response regulator in two-component regulatory system with CheA                           | 2.02 | 1.33 |
| B2040 | rfdD  | rfdD,TDP-rhamnose synthetase, NAD(P)-binding                                                               | 4.51 | 2.24 |
| B2072 | b2072 | b2072,conserved hypothetical protein                                                                       | 1.08 | 1.76 |
| B2092 | gatC  | gatC,PTS family enzyme IIC, galactitol-specific                                                            | 2.27 | 2.34 |
| B2125 | yehT  | yehT,putative response regulator in two-component regulatory system                                        | 1.06 | 1.07 |
| B2208 | napF  | napF,Fe-S ferredoxin-type protein, electron transfer                                                       | 1.70 | 1.45 |
| B2249 | b2249 | b2249,putative competence-damage protein, related to molybdopterin biosynthesis protein                    | 1.45 | 1.17 |
| B2251 | yfaO  | yfaO,putative enzyme (Nudix hydrolase)                                                                     | 5.60 | 1.86 |
| B2280 | nuoJ  | nuoJ,NADH dehydrogenase I chain J                                                                          | 1.14 | 1.10 |
| B2282 | nuoH  | nuoH,NADH dehydrogenase I chain H                                                                          | 1.11 | 1.51 |
| B2290 | yfbQ  | yfbQ,putative PLP-dependent aminotransferase                                                               | 1.32 | 1.72 |
| B2356 | yfdM  | yfdM,CPS-53 (KpLE1) prophage; putative transferase                                                         | 3.55 | 1.79 |
| B2363 | b2363 | b2363,CPS-53 (KpLE1) prophage                                                                              | 2.55 | 1.96 |
| B2440 | eutC  | eutC,ethanolamine ammonia-lyase, light chain                                                               | 1.20 | 1.77 |

|       |       |                                                                                                            |      |      |
|-------|-------|------------------------------------------------------------------------------------------------------------|------|------|
| B2453 | eutG  | eutG,putative alcohol dehydrogenase with dehydroquinone synthase-like domain, in ethanolamine utilization  | 1.05 | 1.49 |
| B2480 | bcp   | bcp,thiol peroxidase, thioredoxin-dependent                                                                | 2.92 | 1.70 |
| B2497 | uraA  | uraA,uracil transport protein (NCS2 family)                                                                | 1.71 | 1.37 |
| B2539 | hcaF  | hcaF,3-phenylpropionate dioxygenase, beta subunit                                                          | 1.11 | 1.51 |
| B2580 | ung   | ung,uracil-DNA-glycosylase                                                                                 | 2.96 | 1.25 |
| B2581 | yfiF  | yfiF,putative tRNA/rRNA methyltransferase                                                                  | 1.12 | 1.60 |
| B2598 | pheL  | pheL,chorismate mutase-P-prephenate dehydratase leader peptide                                             | 2.25 | 1.33 |
| B2599 | pheA  | pheA,bifunctional: chorismate mutase P (N-terminal); prephenate dehydratase (C-terminal)                   | 4.50 | 1.80 |
| B2634 | yfjR  | yfjR,CP4-57 prophage; putative transcriptional repressor (DeoR family)                                     | 2.73 | 1.40 |
| B2647 | ypjA  | ypjA,putative outer membrane protein with pectin lyase-like domain                                         | 1.19 | 1.27 |
| B2649 | b2649 | b2649,conserved protein                                                                                    | 1.01 | 1.33 |
| B2772 | b2772 | b2772,putative enzyme (synthase) with alpha-macroglobulin receptor domain and FAD-linked C-terminal domain | 1.19 | 1.42 |
| B2805 | fucR  | fucR,transcriptional activator for L-fucose utilization (DeoR family)                                      | 1.33 | 1.47 |
| B2850 | ygeF  | ygeF,conserved hypothetical protein                                                                        | 1.79 | 1.23 |
| B2862 | ygeP  | ygeP,unknown CDS                                                                                           | 1.26 | 2.10 |
| B2863 | b2863 | b2863,unknown CDS with six-hairpin glycosyltransferase domain                                              | 2.70 | 1.59 |
| B2866 | xdhA  | xdhA,putative xanthine dehydrogenase subunit, molybdenum cofactor-binding domain                           | 1.84 | 1.99 |
| B2955 | yggW  | yggW,putative oxidase                                                                                      | 1.26 | 1.26 |
| B2991 | hybF  | hybF,putative hydrogenase expression/formation protein                                                     | 1.86 | 1.30 |
| B3019 | parC  | parC,DNA topoisomerase IV, subunit A                                                                       | 1.12 | 1.27 |
| B3132 | agaZ  | agaZ,tagatose 6-phosphate aldolase 1, subunit together with AgaY                                           | 1.30 | 1.29 |
| B3154 | yhbP  | yhbP,conserved protein                                                                                     | 1.30 | 1.44 |
| B3202 | rpoN  | rpoN,sigma N (sigma 54) factor of RNA polymerase                                                           | 1.56 | 1.28 |
| B3203 | yhbH  | yhbH,putative sigma N (sigma 54) modulator                                                                 | 2.83 | 2.00 |
| B3217 | yhcE  | yhcE,unknown CDS                                                                                           | 0.95 | 1.19 |
| B3299 | rpmJ  | rpmJ,50S ribosomal subunit protein X                                                                       | 1.02 | 1.89 |
| B3346 | yheO  | yheO,putative regulator                                                                                    | 1.06 | 1.34 |
| B3361 | fic   | fic,possible cell filamentation protein, induced in stationary phase                                       | 1.13 | 1.19 |
| B3520 | yhjB  | yhjB,putative response regulator in two-component regulatory system                                        | 0.98 | 1.25 |
| B3521 | yhjC  | yhjC,putative transcriptional regulator with periplasmic binding protein domain (LysR family)              | 1.26 | 1.25 |
| B3555 | yaG   | yaG,putative transcriptional regulator with DNA-binding domain                                             | 1.74 | 1.39 |
| B3575 | yaK   | yaK,2,3-diketo-L-gulonate dehydrogenase, NADH-dependent                                                    | 1.30 | 1.27 |
| B3654 | yicE  | yicE,putative purine/xanthine transport protein (NCS2 family)                                              | 1.00 | 1.31 |
| B3685 | yidE  | yidE,putative transport protein                                                                            | 2.40 | 1.19 |
| B3687 | ibpA  | ibpA,small heat shock protein                                                                              | 1.62 | 1.24 |
| B3736 | atpF  | atpF,membrane-bound ATP synthase, F0 sector, subunit b                                                     | 1.19 | 1.77 |

|       |      |                                                                                             |      |      |
|-------|------|---------------------------------------------------------------------------------------------|------|------|
| B3743 | asnC | asnC,transcriptional regulator of asparagine biosynthesis (AsnC family)                     | 2.51 | 1.64 |
| B3745 | yeiM | yeiM,conserved protein with Integrin A (or I) domain                                        | 1.01 | 1.28 |
| B3746 | yeiN | yeiN,putative transcriptional regulator                                                     | 1.41 | 1.37 |
| B3753 | rbsR | rbsR,transcriptional repressor for ribose metabolism (GalR/LacI family)                     | 1.02 | 1.55 |
| B3886 | rbn  | rbn,tRNA processing exoribonuclease BN                                                      | 2.47 | 1.59 |
| B3923 | yiiT | yiiT,putative stress flavoprotein with ETFP electron transfer domain                        | 1.00 | 1.26 |
| B3966 | btuB | btuB,outer membrane porin: cobalamin transport, receptor for E colicins, bacteriophage BF23 | 1.68 | 1.60 |
| B4065 | yjcE | yjcE,putative sodium:hydrogen antiporter (CPA1 family)                                      | 1.42 | 1.38 |
| B4137 | cutA | cutA,periplasmic divalent cation tolerance protein; cytochrome c biogenesis                 | 1.54 | 1.70 |
| B4146 | yjeK | yjeK,putative aminomutase                                                                   | 0.98 | 1.14 |
| B4216 | ytfJ | ytfJ,conserved hypothetical protein                                                         | 1.17 | 1.16 |
| B4267 | idnD | idnD,L-idonate 5-dehydrogenase, NAD-binding                                                 | 1.01 | 1.19 |
| B4305 | sgcX | sgcX,putative endoglucanase with Zn-dependent exopeptidase domain                           | 1.08 | 1.26 |
| B4330 | yjiH | yjiH,putative membrane protein                                                              | 1.25 | 1.28 |
| B4355 | tsr  | tsr,methyl-accepting chemotaxis protein I, serine sensor receptor                           | 0.97 | 1.23 |
| B4395 | gpmB | gpmB,putative phosphoglyceromutase 2                                                        | 0.98 | 1.20 |

| Negative significant genes (SAM score ( $d$ ) $\leq$ 1.0), i.e. under-expressed genes in both the excess-nutrient evolved lines (MGAdp and DHAdp). |           |                                                                             |               |             |
|----------------------------------------------------------------------------------------------------------------------------------------------------|-----------|-----------------------------------------------------------------------------|---------------|-------------|
| B Number                                                                                                                                           | Gene Name | Function                                                                    | Score ( $d$ ) | Fold Change |
| B0015                                                                                                                                              | dnaJ      | dnaJ,heat shock protein (Hsp40), co-chaperone with DnaK                     | -0.97         | 0.80        |
| B0155                                                                                                                                              | yadQ      | yadQ,putative chlorine transport protein (CIC family)                       | -1.01         | 0.77        |
| B0396                                                                                                                                              | araJ      | araJ,arabinose polymer transport protein (MFS family)                       | -1.15         | 0.76        |
| B0491                                                                                                                                              | ybbM      | ybbM,putative transport protein, metal resistance protein (YbbM family)     | -1.61         | 0.79        |
| B0497                                                                                                                                              | rhsD      | rhsD,RhsD protein in RhsD element                                           | -1.49         | 0.73        |
| B0550                                                                                                                                              | rus       | rus,DLP12 prophage; endodeoxyribonuclease RUS (Holliday junction resolvase) | -2.23         | 0.51        |
| B0563                                                                                                                                              | ylcE      | ylcE,DLP12 prophage                                                         | -0.99         | 0.90        |
| B0577                                                                                                                                              | ybdG      | ybdG,putative transport protein                                             | -1.29         | 0.79        |
| B0589                                                                                                                                              | fepG      | fepG,ferric enterobactin transport protein (ABC superfamily, membrane)      | -1.49         | 0.84        |
| B0624                                                                                                                                              | crcB      | crcB,Crc interacts with Csp affecting chromosome condensation               | -1.69         | 0.87        |
| B0647                                                                                                                                              | ybeT      | ybeT,conserved hypothetical protein                                         | -1.56         | 0.64        |

|       |       |                                                                                                                 |       |      |
|-------|-------|-----------------------------------------------------------------------------------------------------------------|-------|------|
| B0651 | rihA  | rihA,ribonucleoside hydrolase 1, pyrimidine-specific                                                            | -1.05 | 0.73 |
| B0713 | ybgL  | ybgL,putative lactam utilization protein                                                                        | -1.48 | 0.61 |
| B0737 | tolQ  | tolQ,inner membrane protein required for outer membrane integrity, uptake of group A colicins and phage DNA     | -1.27 | 0.81 |
| B0762 | ybhT  | ybhT,unknown CDS                                                                                                | -3.65 | 0.53 |
| B0778 | bioD  | bioD,dethiobiotin synthetase                                                                                    | -1.80 | 0.88 |
| B0781 | moaA  | moaA,molybdopterin biosynthesis protein A                                                                       | -6.34 | 0.55 |
| B0848 | ybjM  | ybjM,putative membrane protein                                                                                  | -1.62 | 0.82 |
| B0876 | ybjD  | ybjD,conserved protein with nucleotide triphosphate hydrolase domain                                            | -2.63 | 0.47 |
| B0908 | aroA  | aroA,3-enolpyruvylshikimate-5-phosphate synthetase                                                              | -1.02 | 0.81 |
| B0998 | torD  | torD,cytoplasmic chaperone involved in maturation of TorA                                                       | -1.04 | 0.77 |
| B1033 | ycdW  | ycdW,2-ketoacid reductase                                                                                       | -2.46 | 0.69 |
| B1035 | ycdY  | ycdY,conserved protein                                                                                          | -1.03 | 0.74 |
| B1063 | yceB  | yceB,conserved hypothetical protein                                                                             | -1.30 | 0.65 |
| B1073 | flgB  | flgB,flagellar biosynthesis; cell-proximal portion of basal-body rod                                            | -1.40 | 0.54 |
| B1114 | mfd   | mfd,transcription-repair ATP-dependent coupling factor                                                          | -1.00 | 0.70 |
| B1195 | ymgE  | ymgE,conserved hypothetical protein                                                                             | -1.37 | 0.70 |
| B1201 | dhaR  | dhaR,putative transcriptional regulator in two-component regulatory system                                      | -1.11 | 0.80 |
| B1223 | narK  | narK,nitrite extrusion protein (MFS family)                                                                     | -1.63 | 0.43 |
| B1232 | purU  | purU,formyltetrahydrofolate hydrolase                                                                           | -1.61 | 0.69 |
| B1249 | cls   | cls,cardiolipin synthase                                                                                        | -1.47 | 0.74 |
| B1270 | btuR  | btuR,cob(I)alamin and cobinamide ATP-dependent adenosyltransferase                                              | -5.69 | 0.19 |
| B1271 | yciK  | yciK,putative oxoacyl-(acyl carrier protein) reductase with NAD(P)-binding domain                               | -4.01 | 0.37 |
| B1272 | sohB  | sohB,putative peptidase                                                                                         | -8.67 | 0.25 |
| B1276 | acnA  | acnA,aconitate hydratase 1                                                                                      | -3.51 | 0.46 |
| B1292 | sapC  | sapC,peptide transport protein (ABC superfamily, membrane)                                                      | -1.09 | 0.69 |
| B1335 | ogt   | ogt,O-6-alkylguanine-DNA/cysteine-protein methyltransferase                                                     | -1.53 | 0.76 |
| B1346 | ydaQ  | ydaQ,Rac prophage                                                                                               | -1.16 | 0.58 |
| B1369 | b1369 | b1369,Rac prophage; putative outer membrane protein                                                             | -1.24 | 0.70 |
| B1432 | b1432 | b1432,putative transposase                                                                                      | -2.01 | 0.87 |
| B1514 | ydeY  | ydeY,putative sugar transport protein (ABC superfamily, membrane)                                               | -1.71 | 0.76 |
| B1530 | marR  | marR,transcriptional repressor for antibiotic resistance and oxidative stress                                   | -1.34 | 0.64 |
| B1573 | ydfC  | ydfC,Qin prophage                                                                                               | -1.34 | 0.72 |
| B1607 | ydgC  | ydgC,putative membrane protein                                                                                  | -2.25 | 0.63 |
| B1622 | malY  | malY,bifunctional: PLP-dependent beta-cystathionase; repressor of maltose regulon through interaction with MalT | -1.19 | 0.73 |
| B1640 | ydhH  | ydhH,conserved hypothetical protein with actin-like ATPase domain                                               | -1.08 | 0.63 |
| B1664 | b1664 | b1664,putative enzyme with pectin lyase-like domain                                                             | -5.42 | 0.45 |

|       |       |                                                                                                            |       |      |
|-------|-------|------------------------------------------------------------------------------------------------------------|-------|------|
| B1673 | ydhV  | ydhV,putative aldehyde ferridoxin oxidoreductase                                                           | -1.51 | 0.83 |
| B1767 | ansA  | ansA,cytoplasmic L-asparaginase I                                                                          | -1.38 | 0.85 |
| B1822 | rrmA  | rrmA,23S rRNA m1G745 methyltransferase                                                                     | -1.44 | 0.87 |
| B1885 | tap   | tap,methyl-accepting chemotaxis protein IV, peptide sensor receptor                                        | -1.86 | 0.77 |
| B1889 | motB  | motB,enables flagellar motor rotation, linking torque machinery to cell wall                               | -1.42 | 0.84 |
| B1913 | uvrC  | uvrC,DNA exisiton repair enzyme together with UvrAB                                                        | -1.15 | 0.61 |
| B1929 | yedE  | yedE,putative membrane component of transport system                                                       | -1.80 | 0.43 |
| B1930 | yedF  | yedF,conserved hypothetical protein with SirA-like domain                                                  | -0.97 | 0.55 |
| B1968 | yedV  | yedV,putative sensory kinase in regulatory system                                                          | -2.81 | 0.55 |
| B2012 | yeeD  | yeeD,conserved hypothetical protein with SirA-like domain                                                  | -1.99 | 0.73 |
| B2016 | yeeZ  | yeeZ,putative enzyme with NAD(P)-binding domain                                                            | -1.79 | 0.75 |
| B2105 | yohL  | yohL,conserved hypothetical protein                                                                        | -0.96 | 0.82 |
| B2127 | mlrA  | mlrA,transcriptional regulator of curli and extracellular matrix synthesis (MerR family)                   | -1.15 | 0.60 |
| B2153 | folE  | folE,GTP cyclohydrolase I                                                                                  | -1.25 | 0.73 |
| B2156 | lysP  | lysP,lysine-specific permease (APC family)                                                                 | -1.12 | 0.68 |
| B2199 | ccmC  | ccmC,heme transfer protein, cytochrome c-type biogenesis                                                   | -1.25 | 0.77 |
| B2316 | accD  | accD,acetylCoA carboxylase, carboxyltransferase subunit beta                                               | -3.23 | 0.75 |
| B2320 | pdxB  | pdxB,erythronate-4-phosphate dehydrogenase                                                                 | -1.29 | 0.85 |
| B2443 | b2443 | b2443,CPZ-55 prophage                                                                                      | -1.42 | 0.53 |
| B2491 | hyfR  | hyfR,transcriptional activator for expression of hydrogenase 4 genes, interacts with sigma 54 (EBP family) | -1.22 | 0.89 |
| B2524 | yfhJ  | yfhJ,putative protein believed to be involved in assembly of Fe-S clusters                                 | -1.35 | 0.59 |
| B2526 | hscA  | hscA,chaperone (Hsp70 family), believed to be involved in assembly of Fe-S clusters                        | -1.25 | 0.84 |
| B2593 | yfiH  | yfiH,conserved hypothetical protein                                                                        | -1.58 | 0.60 |
| B2627 | yfjK  | yfjK,CP4-57 prophage                                                                                       | -1.02 | 0.80 |
| B2703 | srlE  | srlE,PTS family enzyme IIBC, glucitol/sorbitol-specific                                                    | -1.29 | 0.67 |
| B2717 | hycl  | hycl,protease involved in processing C-terminal end of HycE                                                | -1.10 | 0.73 |
| B2734 | pphB  | pphB,serine/threonine-specific protein phosphatase 2                                                       | -1.03 | 0.65 |
| B2811 | ygdK  | ygdK,conserved hypothetical protein                                                                        | -1.45 | 0.75 |
| B2827 | thyA  | thyA,thymidylate synthetase                                                                                | -2.12 | 0.80 |
| B2829 | ptsP  | ptsP,PTS family enzyme I, transcriptional regulator (with NPR and NTR proteins)                            | -2.16 | 0.51 |
| B2845 | b2845 | b2845,putative transport protein (HAAAP family)                                                            | -1.68 | 0.42 |
| B2848 | yqeJ  | yqeJ,conserved hypothetical protein                                                                        | -1.26 | 0.76 |
| B2883 | ygfP  | ygfP,guanine deaminase                                                                                     | -1.21 | 0.83 |
| B2896 | ygfX  | ygfX,conserved hypothetical protein                                                                        | -1.66 | 0.73 |
| B2915 | yqfE  | yqfE,conserved hypothetical protein with periplasmic binding protein II-like domain                        | -1.09 | 0.83 |
| B2930 | yggF  | yggF,putative enzyme                                                                                       | -1.10 | 0.85 |

|       |       |                                                                                                 |       |      |
|-------|-------|-------------------------------------------------------------------------------------------------|-------|------|
| B2950 | yggR  | yggR,putative transport protein with P-loop containing nucleoside triphosphate hydrolase domain | -2.79 | 0.66 |
| B2951 | yggS  | yggS,putative enzyme with PLP-binding domain                                                    | -1.30 | 0.74 |
| B3038 | ygiC  | ygiC,putative glutathione-like synthetase                                                       | -1.98 | 0.67 |
| B3059 | ygiH  | ygiH,putative membrane protein                                                                  | -1.31 | 0.54 |
| B3067 | rpoD  | rpoD,sigma D (sigma 70) factor of RNA polymerase                                                | -0.97 | 0.84 |
| B3068 | mug   | mug,DNA glycosylase, G/U mismatch-specific                                                      | -1.28 | 0.83 |
| B3104 | yhaI  | yhaI,putative membrane protein                                                                  | -2.11 | 0.66 |
| B3108 | yhaM  | yhaM,conserved hypothetical protein                                                             | -1.04 | 0.63 |
| B3108 | yhaM  | yhaM,conserved hypothetical protein                                                             | -1.18 | 0.59 |
| B3111 | tdcGa | tdcGa,L-serine dehydratase 3, part 2, fuses with b3112, one orf                                 | -1.71 | 0.66 |
| B3115 | tdcD  | tdcD,propionate kinase/acetate kinase C, anaerobic                                              | -2.93 | 0.39 |
| B3124 | garK  | garK,glycerate kinase I                                                                         | -0.97 | 0.67 |
| B3212 | gltB  | gltB,glutamate synthase, large subunit                                                          | -1.11 | 0.64 |
| B3213 | gltD  | gltD,glutamate synthase, small subunit, nucleotide-binding, 4Fe-4S protein                      | -1.69 | 0.57 |
| B3230 | rpsI  | rpsI,30S ribosomal subunit protein S9                                                           | -2.73 | 0.59 |
| B3242 | yhcR  | yhcR,unknown CDS                                                                                | -1.13 | 0.70 |
| B3248 | yhdE  | yhdE,conserved hypothetical protein with Maf/Ham1 domain                                        | -1.46 | 0.63 |
| B3280 | yrdB  | yrdB,conserved hypothetical protein                                                             | -1.22 | 0.70 |
| B3284 | smg   | smg,conserved hypothetical protein                                                              | -1.10 | 0.48 |
| B3291 | mscL  | mscL,mechanosensitive channel                                                                   | -6.05 | 0.20 |
| B3292 | zntR  | zntR,Zn(II)-responsive transcriptional regulator, regulates Zn export (MerR family)             | -4.62 | 0.27 |
| B3303 | rpsE  | rpsE,30S ribosomal subunit protein S5                                                           | -3.83 | 0.48 |
| B3307 | rpsN  | rpsN,30S ribosomal subunit protein S14                                                          | -1.30 | 0.75 |
| B3312 | rpmC  | rpmC,50S ribosomal subunit protein L29                                                          | -1.29 | 0.61 |
| B3347 | fkpA  | fkpA,FKBP-type peptidyl-prolyl cis-trans isomerase (rotamase)                                   | -1.64 | 0.55 |
| B3355 | prkB  | prkB,putative phosphoribulokinase with nucleoside triP hydrolase domain                         | -1.49 | 0.59 |
| B3406 | greB  | greB,transcription elongation factor and transcript cleavage                                    | -1.81 | 0.43 |
| B3415 | gntT  | gntT,high-affinity gluconate permease in GNT I system (GntP family)                             | -1.10 | 0.76 |
| B3438 | gntR  | gntR,transcriptional repressor for gluconate utilization (GalR/LacI family)                     | -1.09 | 0.91 |
| B3498 | prfC  | prfC,oligopeptidase A                                                                           | -2.18 | 0.60 |
| B3506 | slp   | slp,outer membrane protein, induced after carbon starvation                                     | -2.12 | 0.75 |
| B3597 | yibH  | yibH,putative membrane protein                                                                  | -1.38 | 0.84 |
| B3610 | grxC  | grxC,glutaredoxin 3                                                                             | -0.97 | 0.83 |
| B3621 | rfaC  | rfaC,ADP-heptose; LPS heptosyl transferase I                                                    | -1.12 | 0.81 |
| B3647 | ligB  | ligB,DNA ligase                                                                                 | -1.53 | 0.59 |
| B3673 | emrD  | emrD,multidrug transport protein (MFS family)                                                   | -1.02 | 0.77 |

|       |       |                                                                                                             |       |      |
|-------|-------|-------------------------------------------------------------------------------------------------------------|-------|------|
| B3676 | yidH  | yidH, conserved hypothetical protein                                                                        | -1.76 | 0.72 |
| B3699 | gyrB  | gyrB, DNA gyrase, subunit B (type II topoisomerase)                                                         | -0.97 | 0.85 |
| B3710 | yidY  | yidY, drug/chloramphenicol transport protein (MFS family)                                                   | -1.18 | 0.58 |
| B3742 | mioC  | mioC, FMN-binding protein, required for biotin synthase activity                                            | -1.00 | 0.60 |
| B3824 | rhtB  | rhtB, homoserine/homoserine lactone efflux protein (RhtB family)                                            | -1.70 | 0.57 |
| B3828 | metR  | metR, transcriptional regulator of methionine biosynthesis (LysR family)                                    | -1.22 | 0.65 |
| B3904 | rhaB  | rhaB, rhamnulokinase                                                                                        | -1.26 | 0.74 |
| B3912 | cpxR  | cpxR, response regulator in two-component regulatory system with CpxA                                       | -1.31 | 0.74 |
| B3917 | sbp   | sbp, sulfate transport protein (ABC superfamily, peri_bind)                                                 | -1.67 | 0.60 |
| B3927 | glpF  | glpF, MIP channel, glycerol diffusion                                                                       | -1.39 | 0.78 |
| B3954 | yijO  | yijO, putative transcriptional regulator with homeodomain-like DNA binding domain                           | -1.33 | 0.63 |
| B3962 | sthA  | sthA, soluble pyridine nucleotide transhydrogenase                                                          | -2.95 | 0.55 |
| B3982 | nusG  | nusG, component in transcription antitermination                                                            | -1.12 | 0.78 |
| B3988 | rpoC  | rpoC, RNA polymerase, beta prime subunit                                                                    | -1.87 | 0.47 |
| B4011 | yjaA  | yjaA, conserved hypothetical protein                                                                        | -1.44 | 0.73 |
| B4038 | yjbl  | yjbl, conserved protein                                                                                     | -1.65 | 0.76 |
| B4054 | tyrB  | tyrB, tyrosine aminotransferase, tyrosine-repressible, PLP-dependent                                        | -1.47 | 0.72 |
| B4172 | hfq   | hfq, host factor I for bacteriophage Q beta replication, RNA binding, stimulates poly(A) polymerase I       | -1.35 | 0.76 |
| B4188 | yjfN  | yjfN, conserved hypothetical protein                                                                        | -1.81 | 0.73 |
| B4193 | sgaT  | sgaT, PTS family enzyme IIC, ascorbate-specific                                                             | -1.60 | 0.51 |
| B4220 | ytfM  | ytfM, putative outer membrane protein                                                                       | -1.45 | 0.79 |
| B4247 | yjgG  | yjgG, unknown CDS                                                                                           | -1.53 | 0.79 |
| B4285 | b4285 | b4285, KpLE2 phage-like element; putative transposase                                                       | -2.31 | 0.43 |
| B4290 | fecB  | fecB, KpLE2 phage-like element; citrate-dependent iron (III) transport protein (ABC superfamily, peri_bind) | -1.15 | 0.61 |
| B4309 | yjhS  | yjhS, conserved protein                                                                                     | -1.04 | 0.88 |
| B4311 | yjhA  | yjhA, conserved hypothetical protein, outer membrane domain                                                 | -0.96 | 0.83 |
| B4313 | fimE  | fimE, tyrosine recombinase, regulator of fimA                                                               | -2.87 | 0.55 |
| B4331 | kptA  | kptA, 2'-phosphotransferase                                                                                 | -1.11 | 0.74 |



**B) Significantly expressed genes (SAM score ( $d$ )  $\geq 1.0$  (or)  $\leq -1.0$ ) in environmental shift evolutionary condition.**

Positive significant genes (SAM score ( $d$ )  $\geq 1.0$ ), i.e. over-expressed genes in both the environmental shift evolved lines (MGAdpGal and DHAdpGal).

| B Number | Gene Name | Function                                                                                   | Score ( $d$ ) | Fold Change |
|----------|-----------|--------------------------------------------------------------------------------------------|---------------|-------------|
| B0444    | ybaX      | ybaX,putative (aluminum) resistance protein with adenine nucleotide alpha hydrolase domain | 1.14          | 1.35        |
| B0528    | ybcJ      | ybcJ,putative RNA-binding protein                                                          | 0.96          | 1.37        |
| B1354    | b1354     | b1354,Rac prophage                                                                         | 1.46          | 1.41        |
| B1689    | ydiL      | ydiL,conserved hypothetical protein                                                        | 2.44          | 1.55        |
| B3203    | yhbH      | yhbH,putative sigma N (sigma 54) modulator                                                 | 1.35          | 1.39        |

Negative significant genes (SAM score ( $d$ )  $\leq 1.0$ ), i.e. under-expressed genes in both the environmental shift evolved lines (MGAdpGal and DHAdpGal).

| B Number | Gene Name | Function                                                                          | Score ( $d$ ) | Fold Change |
|----------|-----------|-----------------------------------------------------------------------------------|---------------|-------------|
| B0291    | yagX      | yagX,putative aromatic compound dioxygenase                                       | -1.21         | 0.72        |
| B0422    | xseB      | xseB,exonuclease VII, small subunit                                               | -0.99         | 0.85        |
| B1271    | yciK      | yciK,putative oxoacyl-(acyl carrier protein) reductase with NAD(P)-binding domain | -1.18         | 0.68        |
| B1272    | sohB      | sohB,putative peptidase                                                           | -2.51         | 0.29        |
| B1351    | racC      | racC,Rac prophage; contains recE and oriJ                                         | -0.99         | 0.81        |
| B1445    | ydcX      | ydcX,unknown CDS                                                                  | -1.49         | 0.76        |
| B1464    | yddE      | yddE,conserved protein                                                            | -1.60         | 0.74        |
| B1467    | narY      | narY,nitrate reductase 2, beta subunit                                            | -1.04         | 0.79        |
| B1683    | sufB      | sufB,putative transport protein associated with Fe-S cluster assembly             | -1.28         | 0.73        |
| B1735    | celD      | celD,transcriptional repressor of carbon uptake (AraC/XylS family)                | -1.26         | 0.82        |
| B1820    | b1820     | b1820,conserved protein                                                           | -1.04         | 0.82        |
| B2829    | ptsP      | ptsP,PTS family enzyme I, transcriptional regulator (with NPR and NTR proteins)   | -0.95         | 0.77        |
| B2941    | yqgD      | yqgD,unknown CDS                                                                  | -1.23         | 0.75        |
| B3038    | ygiC      | ygiC,putative glutathione-like synthetase                                         | -2.37         | 0.55        |
| B3056    | cca       | cca,tRNA nucleotidyl transferase                                                  | -1.27         | 0.78        |

|       |      |                                                                                                                        |       |      |
|-------|------|------------------------------------------------------------------------------------------------------------------------|-------|------|
| B3067 | rpoD | rpoD,sigma D (sigma 70) factor of RNA polymerase                                                                       | -1.87 | 0.66 |
| B3068 | mug  | mug,DNA glycosylase, G/U mismatch-specific                                                                             | -1.40 | 0.71 |
| B3104 | yhaI | yhaI,putative membrane protein                                                                                         | -1.78 | 0.59 |
| B3115 | tdcD | tdcD,propionate kinase/acetate kinase C, anaerobic                                                                     | -2.09 | 0.50 |
| B3230 | rpsI | rpsI,30S ribosomal subunit protein S9                                                                                  | -1.83 | 0.62 |
| B3291 | mscL | mscL,mechanosensitive channel                                                                                          | -2.49 | 0.34 |
| B3292 | zntR | zntR,Zn(II)-responsive transcriptional regulator, regulates Zn export (MerR family)                                    | -2.33 | 0.37 |
| B3405 | ompR | ompR,response regulator in two-component regulatory system with EnvZ, regulates ompF and ompC expression               | -1.01 | 0.80 |
| B3498 | prlC | prlC,oligopeptidase A                                                                                                  | -1.36 | 0.73 |
| B3696 | yidX | yidX,conserved hypothetical protein                                                                                    | -1.82 | 0.70 |
| B3697 | yidA | yidA,conserved protein, phosphatase-like domain                                                                        | -1.08 | 0.79 |
| B3802 | hemY | hemY,protein in late step of protoheme IX synthesis with tetratricopeptide repeats (TPR) domain                        | -1.15 | 0.81 |
| B4024 | lysC | lysC,aspartokinase III, lysine sensitive                                                                               | -1.51 | 0.77 |
| B4172 | hfq  | hfq,host factor I for bacteriophage Q beta replication, RNA binding, mRNA degradation, stimulates poly(A) polymerase I | -1.38 | 0.72 |
| B4313 | fimE | fimE,tyrosine recombinase, regulator of fimA                                                                           | -2.02 | 0.65 |

**C) Significantly expressed genes (SAM score (*d*) ≥ 1.0 (or) ≤ -1.0) in prolonged stationary phase evolutionary condition.**

| Positive significant genes (SAM score ( <i>d</i> ) ≥ 1.0), i.e. over-expressed genes in both the prolonged stationary phase evolved lines (MGStat and DHStat). |           |                                                                                                          |                    |             |
|----------------------------------------------------------------------------------------------------------------------------------------------------------------|-----------|----------------------------------------------------------------------------------------------------------|--------------------|-------------|
| B Number                                                                                                                                                       | Gene Name | Function                                                                                                 | Score ( <i>d</i> ) | Fold Change |
| B0057                                                                                                                                                          | yabQ      | yabQ,unknown CDS                                                                                         | 1.07               | 1.30        |
| B0142                                                                                                                                                          | folK      | folK,2-amino-4-hydroxy-6-hydroxymethylidihydropteridine pyrophosphokinase                                | 1.18               | 1.32        |
| B0260                                                                                                                                                          | mmuP      | mmuP,CP4-6 prophage; putative S-methylmethionine transport protein (APC family)                          | 2.57               | 1.94        |
| B0355                                                                                                                                                          | yaiM      | yaiM,putative esterase                                                                                   | 1.15               | 1.33        |
| B0454                                                                                                                                                          | ybaZ      | ybaZ,putative methylated DNA-protein cysteine methyltransferase, C-terminal domain                       | 0.97               | 1.17        |
| B0456                                                                                                                                                          | ybaA      | ybaA,conserved hypothetical protein                                                                      | 2.06               | 1.28        |
| B0471                                                                                                                                                          | ybaB      | ybaB,conserved hypothetical protein                                                                      | 1.01               | 1.25        |
| B0571                                                                                                                                                          | cusR      | cusR,response regulator in two-component regulatory system with CusS, regulation of copper resistance    | 1.48               | 1.23        |
| B0577                                                                                                                                                          | ybdG      | ybdG,putative transport protein                                                                          | 2.10               | 1.63        |
| B0654                                                                                                                                                          | gltJ      | gltJ,glutamate/aspartate transport protein (ABC superfamily, membrane)                                   | 1.14               | 1.29        |
| B0663                                                                                                                                                          | B0663     | B0663,putative rna                                                                                       | 1.10               | 1.15        |
| B0723                                                                                                                                                          | sdhA      | sdhA,succinate dehydrogenase, catalytic and NAD/flavoprotein subunit                                     | 1.09               | 1.29        |
| B0855                                                                                                                                                          | potG      | potG,putrescine transport protein (ABC superfamily, atp_bind)                                            | 1.56               | 1.17        |
| B0859                                                                                                                                                          | rumB      | rumB,23S rRNA m(5)U747 methyltransferase                                                                 | 0.98               | 1.29        |
| B0981                                                                                                                                                          | etk       | etk,tyrosine-protein kinase ETK, autophosphorylates                                                      | 1.06               | 1.31        |
| B1071                                                                                                                                                          | flgM      | flgM,anti-FliA (anti-sigma) factor; also known as RflB protein                                           | 1.17               | 1.19        |
| B1156                                                                                                                                                          | tfaE      | tfaE,e14 prophage; putative tail fiber assembly                                                          | 1.16               | 1.21        |
| B1168                                                                                                                                                          | ycgG      | ycgG,conserved protein                                                                                   | 1.36               | 1.52        |
| B1266                                                                                                                                                          | trpH      | trpH,conserved hypothetical protein                                                                      | 1.16               | 1.29        |
| B1270                                                                                                                                                          | btuR      | btuR,cob(I)alamin and cobinamide ATP-dependent adenosyltransferase                                       | 2.11               | 1.82        |
| B1271                                                                                                                                                          | yciK      | yciK,putative oxoacyl-(acyl carrier protein) reductase with NAD(P)-binding domain                        | 2.07               | 1.77        |
| B1276                                                                                                                                                          | acnA      | acnA,aconitate hydratase 1                                                                               | 2.17               | 1.76        |
| B1285                                                                                                                                                          | gem       | gem,RNase II modulator with PYP-like sensor domain                                                       | 1.16               | 1.27        |
| B1288                                                                                                                                                          | fabI      | fabI,enoyl-[acyl-carrier-protein] reductase (NADH)                                                       | 1.67               | 1.31        |
| B1566                                                                                                                                                          | flxA      | flxA,Qin prophage                                                                                        | 1.63               | 1.26        |
| B1581                                                                                                                                                          | rspA      | rspA,putative dehydratase, starvation-sensing protein, member of enolase family                          | 0.98               | 1.15        |
| B1653                                                                                                                                                          | lhr       | lhr,putative ATP-dependent helicase, superfamily II with P-loop hydrolase domain and winged helix domain | 1.45               | 1.27        |
| B1664                                                                                                                                                          | b1664     | b1664,putative enzyme with pectin lyase-like domain                                                      | 1.88               | 1.54        |
| B1683                                                                                                                                                          | sufB      | sufB,putative transport protein associated with Fe-S cluster assembly                                    | 1.35               | 1.28        |

|       |       |                                                                                                        |      |      |
|-------|-------|--------------------------------------------------------------------------------------------------------|------|------|
| B1688 | ydiK  | ydiK,putative transport protein                                                                        | 1.71 | 1.25 |
| B1940 | fliH  | fliH,flagellar biosynthesis; putative export of flagellar proteins                                     | 1.07 | 1.32 |
| B2094 | gatA  | gatA,PTS family enzyme IIA, galactitol-specific                                                        | 1.03 | 1.27 |
| B2276 | nuoN  | nuoN,NADH dehydrogenase I chain N, membrane subunit                                                    | 1.26 | 1.36 |
| B2363 | b2363 | b2363,CPS-53 (KpLE1) prophage                                                                          | 1.24 | 1.43 |
| B2542 | hcaD  | hcaD,phenylpropionate dioxygenase, ferredoxin reductase subunit                                        | 1.09 | 1.16 |
| B2555 | yfhG  | yfhG,conserved protein                                                                                 | 1.02 | 1.18 |
| B2562 | yfhL  | yfhL,putative 4Fe-4S ferredoxin-type protein                                                           | 1.07 | 1.39 |
| B2585 | pssA  | pssA,phosphatidylserine synthase (CDP-diacylglycerol-serine O-phosphatidyltransferase)                 | 1.22 | 1.15 |
| B2761 | ygcB  | ygcB,putative enzyme with 4 nucleoside triP hydrolase domains                                          | 2.14 | 1.49 |
| B2763 | cysl  | cysl,sulfite reductase, beta subunit, NADPH-dependent hemoprotein                                      | 1.82 | 1.22 |
| B2769 | ygcQ  | ygcQ,putative electron transfer flavoprotein, NAD/FAD-binding domain                                   | 1.00 | 1.28 |
| B2879 | ssnA  | ssnA,putative protein with metallo-dependent hydrolase domain, commonly a deaminase                    | 1.05 | 1.09 |
| B3063 | ygjE  | ygjE,putative tartrate:succinate antiporter (DASS family)                                              | 0.99 | 1.18 |
| B3067 | rpoD  | rpoD,sigma D (sigma 70) factor of RNA polymerase                                                       | 1.58 | 1.28 |
| B3068 | mug   | mug,DNA glycosylase, G/U mismatch-specific                                                             | 1.35 | 1.27 |
| B3261 | fis   | fis,DNA-binding protein for site-specific recombination and inversion                                  | 1.14 | 1.27 |
| B3291 | mscL  | mscL,mechanosensitive channel                                                                          | 1.10 | 3.23 |
| B3292 | zntR  | zntR,Zn(II)-responsive transcriptional regulator, regulates Zn export (MerR family)                    | 3.69 | 2.82 |
| B3348 | slyX  | slyX,conserved hypothetical protein                                                                    | 1.34 | 1.33 |
| B3548 | yhjY  | yhjY,putative lipase                                                                                   | 1.06 | 1.26 |
| B3570 | bax   | bax,conserved hypothetical protein                                                                     | 1.68 | 1.36 |
| B3652 | recG  | recG,DNA helicase, ATP-dependent resolution of Holliday junctions, branch migration                    | 1.05 | 1.08 |
| B3744 | asnA  | asnA,asparagine synthetase A                                                                           | 1.35 | 1.29 |
| B3783 | rho   | rho,transcription termination factor Rho; polarity suppressor                                          | 1.39 | 1.25 |
| B3786 | wecB  | wecB,UDP-N-acetyl glucosamine-2-epimerase                                                              | 1.30 | 1.29 |
| B3788 | rffG  | rffG,dTDP-glucose 4,6-dehydratase                                                                      | 1.40 | 1.36 |
| B3860 | dsbA  | dsbA,periplasmic protein disulfide isomerase I, disulfide bond formation                               | 1.15 | 1.26 |
| B3894 | fdoG  | fdoG,formate dehydrogenase-O, major subunit                                                            | 1.39 | 1.35 |
| B4088 | alsB  | alsB,allose transport protein (ABC superfamily, peri_bind)                                             | 1.45 | 1.22 |
| B4147 | efp   | efp,elongation factor P (EF-P)                                                                         | 2.33 | 1.36 |
| B4156 | yjeM  | yjeM,putative amino-acid transport protein (APC family)                                                | 2.52 | 1.36 |
| B4159 | yjeP  | yjeP,putative periplasmic binding protein                                                              | 1.70 | 1.34 |
| B4168 | yjeE  | yjeE,putative enzyme with nucleoside triP hydrolase domain                                             | 1.07 | 1.18 |
| B4170 | mutL  | mutL,enzyme in methyl-directed mismatch repair, stimulates binding of Vsr and MutS to heteroduplex DNA | 2.21 | 1.55 |
| B4172 | hfq   | hfq,host factor I for bacteriophage Q beta replication, RNA binding, stimulates poly(A) polymerase I   | 1.88 | 1.42 |
| B4181 | yjfl  | yjfl,conserved hypothetical protein                                                                    | 1.09 | 1.17 |

|       |      |                                                                                              |      |      |
|-------|------|----------------------------------------------------------------------------------------------|------|------|
| B4201 | priB | priB,primosomal replication protein N                                                        | 1.85 | 1.51 |
| B4206 | ytfB | ytfB,conserved protein                                                                       | 1.87 | 1.33 |
| B4292 | fecR | fecR,KpLE2 phage-like element; membrane-bound regulator in multi-component regulatory system | 1.32 | 1.28 |

Negative significant genes (SAM score ( $d$ )  $\leq$  1.0), i.e. under-expressed genes in both the prolonged stationary phase evolved lines (MGStat and DHStat).

| B Number | Gene Name | Function                                                                                               | Score ( $d$ ) | Fold Change |
|----------|-----------|--------------------------------------------------------------------------------------------------------|---------------|-------------|
| B0208    | yafC      | yafC,putative transcriptional regulator with periplasmic binding protein domain (LysR family)          | -1.27         | 0.80        |
| B0479    | fsr       | fsr,fosmidomycin/multidrug transport protein (MFS family)                                              | -0.96         | 0.71        |
| B0483    | ybaQ      | ybaQ,putative repressor with DNA-binding domain                                                        | -1.41         | 0.80        |
| B0602    | ybdN      | ybdN,conserved protein with adenine nucleotide alpha hydrolase domain                                  | -1.02         | 0.87        |
| B0721    | sdhC      | sdhC,succinate dehydrogenase, hydrophobic subunit, cytochrome b556 with SdhD                           | -1.39         | 0.73        |
| B0781    | moaA      | moaA,molybdopterin biosynthesis protein A                                                              | -1.79         | 0.76        |
| B0814    | ompX      | ompX,outer membrane protease, receptor for phage OX2                                                   | -1.86         | 0.72        |
| B1099    | hoIB      | hoIB,DNA polymerase III, delta prime subunit                                                           | -1.56         | 0.76        |
| B1216    | chaA      | chaA,sodium/calcium:proton antiporter (CaCA family)                                                    | -0.98         | 0.84        |
| B1235    | hnr       | hnr,response regulator involved in protein turnover, controls stability of RpoS                        | -1.03         | 0.86        |
| B1312    | ycjP      | ycjP,putative transport protein (ABC superfamily, membrane)                                            | -2.42         | 0.68        |
| B1389    | paaB      | paaB,putative subunit of multicomponent oxygenase, phenylacetic acid degradation                       | -0.95         | 0.84        |
| B1490    | yddV      | yddV,conserved protein                                                                                 | -1.42         | 0.81        |
| B1601    | b1601     | b1601,putative integral membrane transport protein                                                     | -0.97         | 0.83        |
| B1689    | ydiL      | ydiL,conserved hypothetical protein                                                                    | -1.11         | 0.79        |
| B1695    | ydiO      | ydiO,putative acyl-CoA dehydrogenase (flavoprotein)                                                    | -1.57         | 0.81        |
| B1839    | b1839     | b1839,conserved hypothetical protein                                                                   | -1.23         | 0.79        |
| B2024    | hisA      | hisA,N-(5'-phospho-L-ribosyl-formimino)-5-amino-1-(5'-phosphoribosyl)-4-imidazolecarboxamide isomerase | -1.34         | 0.80        |
| B2107    | b2107     | b2107,unknown CDS                                                                                      | -2.28         | 0.72        |
| B2133    | dld       | dld,D-lactate dehydrogenase, NADH-independent, FAD-binding domain                                      | -1.14         | 0.77        |
| B2503    | b2503     | b2503,putative oxidative protein                                                                       | -1.20         | 0.80        |
| B2537    | hcaR      | hcaR,transcriptional activator of hca cluster (LysR family)                                            | -0.97         | 0.79        |
| B2565    | recO      | recO,gap repair protein, part of RecFOR complex that targets RecA to ssDNA-dsDNA junction              | -1.25         | 0.77        |
| B2690    | yqaB      | yqaB,putative phosphoglucomutase, contains a phosphatase-like domain                                   | -2.01         | 0.73        |
| B2697    | alaS      | alaS,alanyl-tRNA synthetase                                                                            | -1.15         | 0.86        |
| B2701    | mltB      | mltB,membrane-bound lytic murein transglycosylase B                                                    | -1.17         | 0.77        |

|       |       |                                                                                                                  |       |      |
|-------|-------|------------------------------------------------------------------------------------------------------------------|-------|------|
| B2802 | fucl  | fucl,L-fucose isomerase                                                                                          | -0.96 | 0.80 |
| B2808 | gcvA  | gcvA,transcriptional regulator (positive) of cleavage of glycine (LysR family)                                   | -1.38 | 0.75 |
| B2809 | ygdI  | ygdI,unknown CDS                                                                                                 | -1.92 | 0.74 |
| B2819 | recD  | recD,exonuclease V, alpha chain with recC and recD: 5' and 3' nuclease, ATPase, recombinase, helicase            | -1.55 | 0.85 |
| B2829 | ptsP  | ptsP,PTS family enzyme I, transcriptional regulator (with NPR and NTR proteins)                                  | -1.82 | 0.64 |
| B2895 | fldB  | fldB,flavodoxin 2                                                                                                | -1.04 | 0.87 |
| B2898 | ygfZ  | ygfZ,putative enzyme                                                                                             | -1.55 | 0.70 |
| B2930 | yggF  | yggF,putative enzyme                                                                                             | -1.13 | 0.84 |
| B2937 | speB  | speB,agmatinase                                                                                                  | -1.71 | 0.78 |
| B2999 | b2999 | b2999,putative enzyme with alpha/beta-hydrolase-like domain                                                      | -0.98 | 0.89 |
| B3015 | ygiQ  | ygiQ,conserved protein                                                                                           | -1.04 | 0.80 |
| B3136 | agaS  | agaS,putative tagatose-6-phosphate ketose/aldose isomerase with phosphosugar-binding domain                      | -1.14 | 0.80 |
| B3211 | yhcC  | yhcC,putative enzyme                                                                                             | -1.43 | 0.84 |
| B3494 | uspB  | uspB,universal stress protein B                                                                                  | -1.04 | 0.79 |
| B3510 | hdeA  | hdeA,conserved protein with protein HNS-dependent expression A; HdeA-like domain                                 | -1.91 | 0.77 |
| B3516 | gadX  | gadX,transcriptional regulator for glutamic acid decarboxylase and transporter (gadA, gad BC) (AraC/XylS family) | -2.22 | 0.87 |
| B3698 | yidB  | yidB,conserved hypothetical protein                                                                              | -2.63 | 0.76 |
| B3913 | cpxP  | cpxP,periplasmic repressor of cpx regulon by interaction with CpxA                                               | -1.35 | 0.76 |
| B4013 | metA  | metA,homoserine transsuccinylase                                                                                 | -1.20 | 0.83 |
| B4053 | alr   | alr,alanine racemase 1, PLP-binding, biosynthetic                                                                | -1.08 | 0.76 |
| B4080 | yjcP  | yjcP,putative outer membrane protein                                                                             | -3.24 | 0.77 |
| B4108 | phnA  | phnA,putative alkylphosphonate uptake protein in phosphonate metabolism                                          | -0.98 | 0.85 |
| B4115 | adiC  | adiC,arginine:amgatine antiporter (APC family)                                                                   | -1.10 | 0.82 |
| B4321 | gntP  | gntP,gluconate transport protein, GNT III system (GntP family)                                                   | -1.40 | 0.82 |
| B4338 | yjiP  | yjiP,putative transposase                                                                                        | -2.90 | 0.69 |
