# Supplementary material for: Perceiving molecular evolution processes in Escherichia coliby comprehensive metabolite and gene expression profiling
Source: Springer Nature journal article supplement (doi:10.1186/gb-2008-9-4-r72), 2008-04-10
Supplement: 13059_2007_1934_MOESM4_ESM.pdf [file 13059_2007_1934_MOESM4_ESM.pdf]

## Gene expression changes in experimental evolutionary conditions.

Significant (Wilcoxon rank sum test;  $P \leq 0.05$  shown in bold) functional categories involved in excess-nutrient adaptive evolutionary condition.

| Bin      | Functional annotation                                                                                                                                                       | No of Genes | MG/ MGAdp    | No of Genes | DH/ DHAdp    |
|----------|-----------------------------------------------------------------------------------------------------------------------------------------------------------------------------|-------------|--------------|-------------|--------------|
| 1.2      | Macromolecule degradation > GO:macromolecule catabolism ; GO:0009057                                                                                                        | 105         | <b>0.045</b> | 105         | 0.312        |
| 1.3      | Energy metabolism (carbon) > GO:energy derivation by oxidation of organic compounds ; GO:0015980                                                                            | 299         | <b>0.012</b> | 299         | 0.920        |
| 2.1      | DNA related > GO:DNA metabolism ; GO:0006259                                                                                                                                | 163         | <b>0.006</b> | 163         | <b>0.004</b> |
| 4        | Transport > GO:transporter activity ; GO:0005215 > GO:transport ; GO:0006810                                                                                                | 1215        | 0.783        | 1215        | <b>0.028</b> |
| 5.1      | Cell division > GO:cytokinesis ; GO:0000910                                                                                                                                 | 95          | <b>0.035</b> | 95          | 0.230        |
| 6.6      | Ribosome > GO:cytosolic ribosome (sensu Bacteria) ; GO:0009281                                                                                                              | 68          | 0.098        | 68          | <b>0.018</b> |
| 8        | extrachromosomal > GO:.                                                                                                                                                     | 300         | 0.300        | 300         | <b>0.027</b> |
| 8.4      | Colicin related > GO:.                                                                                                                                                      | 9           | 0.165        | 9           | <b>0.034</b> |
| 1.1.2.2  | 3-phenylpropionate and 3-(3-hydroxyphenyl)propionate degradation > GO:3-phenylpropionate catabolism ; GO:0019380 > GO:3-(3-hydroxy)phenylpropionate catabolism ; GO:0019622 | 11          | <b>0.049</b> | 11          | <b>0.000</b> |
| 1.1.3    | Amino acids > GO:amino acid catabolism ; GO:0009063                                                                                                                         | 74          | 0.927        | 74          | <b>0.034</b> |
| 1.1.3.5  | Glycine cleavage > GO:glycine decarboxylation via glycine cleavage system ; GO:0019464                                                                                      | 7           | 0.611        | 7           | <b>0.010</b> |
| 1.1.5.2  | Ethanol degradation > GO:ethanol catabolism ; GO:0006068                                                                                                                    | 12          | <b>0.025</b> | 12          | 0.271        |
| 1.2.2    | DNA > GO:DNA catabolism ; GO:0006308                                                                                                                                        | 26          | <b>0.043</b> | 26          | 0.068        |
| 1.3.9    | Entner-Doudoroff pathway > GO:Entner-Doudoroff pathway ; GO:0009255                                                                                                         | 4           | <b>0.041</b> | 4           | 0.323        |
| 1.5.1.11 | Serine > GO:serine biosynthesis ; GO:0006564                                                                                                                                | 6           | <b>0.025</b> | 6           | 0.080        |
| 1.5.1.12 | Cysteine > GO:cysteine biosynthesis ; GO:0019344                                                                                                                            | 6           | <b>0.049</b> | 6           | 0.927        |
| 1.5.1.15 | Tryptophan > GO:tryptophan biosynthesis ; GO:0000162                                                                                                                        | 13          | <b>0.012</b> | 13          | <b>0.020</b> |
| 1.5.1.17 | Alanine > GO:alanine biosynthesis ; GO:0006523                                                                                                                              | 4           | <b>0.038</b> | 4           | 0.770        |
| 1.5.1.21 | Homoserine > GO:homoserine biosynthesis ; GO:0009090                                                                                                                        | 6           | 0.752        | 6           | <b>0.010</b> |
| 1.5.1.4  | Proline > GO:proline biosynthesis ; GO:0006561                                                                                                                              | 8           | 0.752        | 8           | <b>0.036</b> |
| 1.5.1.7  | Lysine, diaminopimelate > GO:lysine biosynthesis via diaminopimelate ; GO:0009089                                                                                           | 16          | 0.153        | 16          | <b>0.038</b> |
| 1.5.3.14 | Enterochelin (enterobactin) > GO:enterobactin biosynthesis ; GO:0009239                                                                                                     | 6           | 0.589        | 6           | <b>0.011</b> |
| 1.5.3.4  | Molybdenum (molybdopterin) > GO:Mo-molybdopterin cofactor biosynthesis ; GO:0006777                                                                                         | 18          | <b>0.021</b> | 18          | 0.108        |
| 1.5.3.6  | Pyridoxine (vitamin B6) > GO:pyridoxine biosynthesis ; GO:0008615                                                                                                           | 9           | 0.677        | 9           | <b>0.036</b> |
| 1.5.4    | Fatty acid and phosphatidic acid > GO:fatty acid biosynthesis ; GO:0006633 ; GO:phosphatidic acid biosynthesis ; GO:0006654                                                 | 26          | <b>0.005</b> | 26          | 0.215        |
| 1.6.12   | Flagella > GO:flagella biogenesis ; GO:0009296                                                                                                                              | 37          | 0.258        | 37          | <b>0.043</b> |

|          |                                                                                                                                                                                                                                      |     |              |     |              |
|----------|--------------------------------------------------------------------------------------------------------------------------------------------------------------------------------------------------------------------------------------|-----|--------------|-----|--------------|
| 1.6.3.2  | Core region > GO:lipopolysaccharide core region biosynthesis ; GO:0009244                                                                                                                                                            | 17  | 0.952        | 17  | <b>0.029</b> |
| 1.6.6    | Osmoregulated periplasmic glucan > GO:glucan biosynthesis ; GO:0009250                                                                                                                                                               | 2   | <b>0.049</b> | 2   | 0.218        |
| 1.7.18   | Betaine biosynthesis > GO:betaine biosynthesis ; GO:0006578                                                                                                                                                                          | 4   | 0.302        | 4   | <b>0.011</b> |
| 1.7.3    | Pentose phosphate shunt, non-oxidative branch > GO:pentose-phosphate shunt, non-oxidative branch ; GO:0009052                                                                                                                        | 8   | <b>0.036</b> | 8   | <b>0.019</b> |
| 2.1.5    | DNA degradation > GO:DNA catabolism ; GO:0006308                                                                                                                                                                                     | 27  | <b>0.049</b> | 27  | 0.069        |
| 2.2.3    | RNA modification > GO:RNA modification ; GO:0009451                                                                                                                                                                                  | 53  | <b>0.028</b> | 53  | <b>0.029</b> |
| 2.3.2    | Translation > GO:protein biosynthesis ; GO:0006412                                                                                                                                                                                   | 74  | 0.121        | 74  | <b>0.024</b> |
| 2.3.6    | Turnover, degradation > GO:proteolysis and peptidolysis ; GO:0006508                                                                                                                                                                 | 10  | 0.527        | 10  | <b>0.002</b> |
| 2.3.8    | Ribosomal proteins > GO:structural constituent of ribosome ; GO:0003735                                                                                                                                                              | 57  | 0.190        | 57  | <b>0.017</b> |
| 3.1.1    | DNA structure level > GO:.                                                                                                                                                                                                           | 14  | <b>0.010</b> | 14  | <b>0.002</b> |
| 3.1.1.2  | Methylation > GO:DNA methylation ; GO:0006306                                                                                                                                                                                        | 5   | <b>0.022</b> | 5   | 0.083        |
| 3.1.3.1  | Translation attenuation and efficiency > GO:translational attenuation ; GO:0009386                                                                                                                                                   | 10  | <b>0.024</b> | 10  | 0.101        |
| 3.1.3.4  | Proteases, cleavage of compounds > GO:peptidase activity ; GO:0008233                                                                                                                                                                | 9   | 0.268        | 9   | <b>0.036</b> |
| 4.10.119 | methylgalactoside/galactose > GO:galactose transporter activity ; GO:0005354 > GO:galactose transporter activity ; GO:0005354 > GO:methylgalactoside transporter activity ; GO:0015592 > GO:methylgalactoside transport ; GO:0015765 | 4   | 0.660        | 4   | <b>0.049</b> |
| 4.10.155 | phosphate > GO:phosphate transport ; GO:0006817 > GO:phosphate transporter activity ; GO:0015114                                                                                                                                     | 7   | <b>0.030</b> | 7   | 0.643        |
| 4.10.185 | uracil > GO:uracil transport ; GO:0015857 > GO:uracil transporter activity ; GO:0015210                                                                                                                                              | 2   | <b>0.032</b> | 2   | 0.058        |
| 4.10.31  | chloramphenicol > GO:chloramphenicol transport ; GO:0042892                                                                                                                                                                          | 2   | <b>0.023</b> | 2   | <b>0.022</b> |
| 4.10.5   | alkanesulfonate > GO:alkanesulphonate transport ; GO:0042918 > GO:alkanesulphonate transporter activity ; GO:0042959                                                                                                                 | 3   | 0.159        | 3   | <b>0.036</b> |
| 4.10.78  | glycerol-3-P > GO:glycerol transport ; GO:0015793 > GO:glycerol-3-phosphate transporter activity ; GO:0015169                                                                                                                        | 5   | <b>0.020</b> | 5   | 0.103        |
| 4.10.79  | glycine betaine choline transport > GO:betaine transport ; GO:0015838 > choline transport ; GO:0015871                                                                                                                               | 5   | <b>0.046</b> | 5   | 0.325        |
| 4.2.1    | Porters (Uni-, Sym- and Antiporters) > GO:symporter activity ; GO:0015293 > GO:antiporter activity ; GO:0015297 > GO:uniporter activity ; GO:0015292                                                                                 | 203 | <b>0.050</b> | 203 | 0.178        |
| 4.2.1.20 | The Inorganic Phosphate Transporter (PiT) Family > GO:inorganic phosphate transporter ; GO:0005315                                                                                                                                   | 3   | <b>0.018</b> | 3   | 0.454        |
| 4.2.1.21 | The Solute:Sodium Symporter (SSS) Family > GO:solute:sodium symporter ; GO:0015370                                                                                                                                                   | 4   | <b>0.015</b> | 4   | <b>0.008</b> |
| 4.2.1.7  | The Small Multidrug Resistance (SMR) Family > GO:multidrug transporter ; GO:0015239                                                                                                                                                  | 6   | <b>0.050</b> | 6   | 0.190        |
| 4.3.1    | Pyrophosphate Bond (ATP; GTP; P2) Hydrolysis-driven Active Transporters > GO:ATPase activity ; GO:0016887                                                                                                                            | 262 | <b>0.046</b> | 262 | 0.603        |
| 4.3.1.1  | The ATP-binding Cassette (ABC) Superfamily + ABC-type Uptake Permeases > GO:ATP-binding cassette (ABC) transporter activity ; GO:0004009                                                                                             | 235 | <b>0.029</b> | 235 | 0.417        |
| 4.8.1.3  | MPA1 Family auxillary transport protein> GO:.                                                                                                                                                                                        | 2   | 0.083        | 2   | <b>0.035</b> |
| 4.9.1    | Recognized transporters of unknown biochemical mechanism > GO:transporter activity ; GO:0005215 > GO:transport ; GO:0006810                                                                                                          | 4   | 0.243        | 4   | <b>0.034</b> |

Significant (Wilcoxon rank sum test;  $P \leq 0.05$  shown in bold) functional categories involved in environmental shift evolutionary condition.

| Bin      | Functional annotation                                                                                             | No of Genes | MGal/<br>MGAdpGal | No of Genes | DHGal/<br>DHAdpGal |
|----------|-------------------------------------------------------------------------------------------------------------------|-------------|-------------------|-------------|--------------------|
| 1.2      | Macromolecule degradation > GO:macromolecule catabolism ; GO:0009057                                              | 104         | 0.801             | 104         | <b>0.022</b>       |
| 6.3      | Surface antigens (ECA, O antigen of LPS) > GO:cell surface antigen activity, host-interacting ; GO:0042280        | 63          | 0.184             | 63          | <b>0.002</b>       |
| 8        | extrachromosomal > GO:.                                                                                           | 292         | 0.233             | 292         | <b>0.002</b>       |
| 8.1      | Prophage genes and phage related functions > GO:.                                                                 | 258         | 0.459             | 258         | <b>0.002</b>       |
| 8.4      | Colicin related > GO:.                                                                                            | 9           | <b>0.028</b>      | 9           | 0.660              |
| 1.2.2    | DNA > GO:DNA catabolism ; GO:0006308                                                                              | 25          | 0.854             | 25          | <b>0.023</b>       |
| 1.2.4    | Polysaccharides > GO:polysaccharide catabolism ; GO:0000272                                                       | 7           | <b>0.034</b>      | 7           | 0.978              |
| 1.5.1.11 | Serine > GO:serine biosynthesis ; GO:0006564                                                                      | 6           | <b>0.046</b>      | 6           | 0.600              |
| 1.5.1.16 | Histidine > GO:histidine biosynthesis ; GO:0000105                                                                | 12          | <b>0.003</b>      | 12          | 0.845              |
| 1.5.3.8  | Thiamine (Vitamin B1) > GO:thiamin biosynthesis ; GO:0009228                                                      | 15          | 0.666             | 15          | <b>0.013</b>       |
| 1.6.3    | Lipopolysaccharide > GO:lipopolysaccharide biosynthesis ; GO:0009103                                              | 47          | 0.081             | 47          | <b>0.001</b>       |
| 1.6.3.1  | O antigen > GO:O antigen biosynthesis ; GO:0009243                                                                | 15          | <b>0.014</b>      | 15          | <b>0.000</b>       |
| 1.6.3.2  | Core region > GO:lipopolysaccharide core region biosynthesis ; GO:0009244                                         | 17          | 0.829             | 17          | <b>0.004</b>       |
| 1.6.4    | Enterobacterial common antigen (surface glycolipid) > GO:enterobacterial common antigen biosynthesis ; GO:0009246 | 12          | 0.053             | 12          | <b>0.016</b>       |
| 1.7.10   | Sugar nucleotide biosynthesis, conversions > GO:nucleotide-sugar biosynthesis ; GO:0009226                        | 15          | 0.341             | 15          | <b>0.008</b>       |
| 1.7.13   | Amino acid conversion > GO:amino acid metabolism ; GO:0006520                                                     | 3           | <b>0.011</b>      | 3           | 0.770              |
| 1.7.14   | Polyamine biosynthesis > GO:polyamine biosynthesis ; GO:0006596                                                   | 19          | <b>0.004</b>      | 19          | 0.710              |
| 1.7.7    | Galactose metabolism > GO:galactose metabolism ; GO:0006012                                                       | 5           | <b>0.036</b>      | 5           | 0.286              |
| 2.2.5    | tRNA > GO:tRNA metabolism ; GO:0006399                                                                            | 2           | <b>0.036</b>      | 2           | 0.401              |
| 3.1.2.3  | Repressor > GO:transcriptional repressor activity ; GO:0016564                                                    | 138         | <b>0.037</b>      | 138         | 0.509              |
| 3.1.4    | Regulation level unknown > GO:.                                                                                   | 73          | <b>0.019</b>      | 73          | 0.746              |
| 3.3.1    | Operon (regulation of one operon) > GO:.                                                                          | 127         | 0.205             | 127         | <b>0.027</b>       |
| 4.10.118 | methionine > GO:methionine transport ; GO:0015821 > GO:methionine transporter activity ; GO:0015191               | 4           | 0.904             | 4           | <b>0.045</b>       |
| 4.10.12  | amino acid > GO:amino acid transporter activity ; GO:0015171 > GO:amino acid transport ; GO:0006865               | 12          | 0.628             | 12          | <b>0.047</b>       |
| 4.10.173 | sugar > GO:carbohydrate transport ; GO:0008643 > GO:carbohydrate transporter activity ; GO:0015144                | 33          | <b>0.006</b>      | 33          | 0.674              |
| 4.10.177 | thiamine > GO:thiamin transport ; GO:0015888 > GO:thiamin transporter activity ; GO:0015234                       | 4           | 0.920             | 4           | <b>0.001</b>       |
| 4.10.191 | Zn > GO:zinc ion transport ; GO:0006829 > GO:zinc ion transporter activity ; GO:0005385                           | 3           | <b>0.028</b>      | 3           | 0.491              |
| 4.10.71  | glucose > GO:glucose transport ; GO:0015758 > GO:glucose transporter activity ; GO:0005355                        | 2           | 0.099             | 2           | <b>0.047</b>       |
| 4.10.82  | H+ > GO:proton transport ; GO:0015992 > GO:hydrogen ion transporter activity ; GO:0015078                         | 14          | 0.530             | 14          | <b>0.007</b>       |

|           |                                                                                                                                                                                                                                                   |    |       |    |              |
|-----------|---------------------------------------------------------------------------------------------------------------------------------------------------------------------------------------------------------------------------------------------------|----|-------|----|--------------|
| 4.2.1.38  | The K <sup>+</sup> Transporter (Trk) Family > GO:potassium:hydrogen antiporter ; GO:0015386 > GO:potassium:hydrogen symporter ; GO:0015387                                                                                                        | 3  | 0.776 | 3  | <b>0.039</b> |
| 4.3.1.1.1 | ATP binding component > GO:.                                                                                                                                                                                                                      | 89 | 0.159 | 89 | <b>0.018</b> |
| 4.3.1.2   | The H <sup>+</sup> /Na <sup>+</sup> -translocating F-, V- and A-type ATPase (F-ATPase) Superfamily > GO:hydrogen-translocating F-type ATPase complex (sensu Bacteria) ; GO:0045256 > GO:hydrogen-translocating V-type ATPase complex ; GO:0016471 | 8  | 0.640 | 8  | <b>0.012</b> |

Significant (Wilcoxon rank sum test;  $P \leq 0.05$  shown in bold) functional categories involved in prolonged stationary phase evolutionary condition.

| Bin      | Functional annotation                                                                                                                                                       | No of Genes | MG/ MGStat   | No of Genes | DH/ DHStat   |
|----------|-----------------------------------------------------------------------------------------------------------------------------------------------------------------------------|-------------|--------------|-------------|--------------|
| 1.6      | Macromolecules (cellular constituent) biosynthesis > GO:macromolecule biosynthesis ; GO:0009059                                                                             | 272         | <b>0.001</b> | 272         | 0.335        |
| 5.2      | Cell cycle physiology > GO:cell cycle ; GO:0007049                                                                                                                          | 5           | 0.786        | 5           | <b>0.009</b> |
| 5.3      | Motility (incl. chemotaxis, energytaxis, aerotaxis, redoxaxis) > GO:taxis ; GO:0042330                                                                                      | 59          | <b>0.043</b> | 59          | 0.946        |
| 6.3      | Surface antigens (ECA, O antigen of LPS) > GO:cell surface antigen activity, host-interacting ; GO:0042280                                                                  | 65          | <b>0.048</b> | 65          | 0.280        |
| 6.6      | Ribosome > GO:cytosolic ribosome (sensu Bacteria) ; GO:0009281                                                                                                              | 66          | 0.514        | 66          | <b>0.031</b> |
| 8        | extrachromosomal > GO:.                                                                                                                                                     | 298         | 0.214        | 298         | <b>0.001</b> |
| 8.1      | Prophage genes and phage related functions > GO:.                                                                                                                           | 264         | 0.107        | 264         | <b>0.000</b> |
| 1.1.1.18 | Trehalose degradation, low osmolarity > GO:trehalose catabolism ; GO:0005993                                                                                                | 3           | 0.898        | 3           | <b>0.047</b> |
| 1.1.1.25 | L-ascorbate degradation > GO:L-ascorbic acid catabolism ; GO:0019854                                                                                                        | 11          | 0.981        | 11          | <b>0.001</b> |
| 1.1.1.3  | D-arabinose catabolism > GO:D-arabinose catabolism ; GO:0019571                                                                                                             | 3           | 0.077        | 3           | <b>0.011</b> |
| 1.1.2.2  | 3-phenylpropionate and 3-(3-hydroxyphenyl)propionate degradation > GO:3-phenylpropionate catabolism ; GO:0019380 > GO:3-(3-hydroxy)phenylpropionate catabolism ; GO:0019622 | 11          | 0.527        | 11          | <b>0.018</b> |
| 1.1.2.3  | Propionate degradation > GO:propionate catabolism ; GO:0019543                                                                                                              | 9           | 0.968        | 9           | <b>0.010</b> |
| 1.1.3.7  | Threonine catabolism > GO:threonine catabolism ; GO:0006567                                                                                                                 | 12          | <b>0.050</b> | 12          | <b>0.023</b> |
| 1.1.4.3  | Ornithine degradation > GO:ornithine catabolism ; GO:0006593                                                                                                                | 2           | <b>0.026</b> | 2           | 0.104        |
| 1.1.5    | Others > GO:.                                                                                                                                                               | 29          | 0.171        | 29          | <b>0.033</b> |
| 1.1.5.2  | Ethanol degradation > GO:ethanol catabolism ; GO:0006068                                                                                                                    | 10          | 0.347        | 10          | <b>0.018</b> |
| 1.5.1.17 | Alanine > GO:alanine biosynthesis ; GO:0006523                                                                                                                              | 4           | 0.962        | 4           | <b>0.004</b> |
| 1.5.1.21 | Homoserine > GO:homoserine biosynthesis ; GO:0009090                                                                                                                        | 6           | 0.271        | 6           | <b>0.024</b> |
| 1.5.1.6  | Asparagine > GO:asparagine biosynthesis ; GO:0006529                                                                                                                        | 4           | <b>0.038</b> | 4           | 0.191        |
| 1.5.3    | Cofactor, small molecule carrier > GO:coenzymes and prosthetic group biosynthesis ; GO:0046138                                                                              | 168         | <b>0.009</b> | 168         | 0.300        |
| 1.5.3.12 | Heme, porphyrine > GO:heme biosynthesis ; GO:0006783 > GO:porphyrin biosynthesis ; GO:0006779                                                                               | 16          | 0.971        | 16          | <b>0.041</b> |

|          |                                                                                                                                                                                                                                                                                                      |    |              |    |              |
|----------|------------------------------------------------------------------------------------------------------------------------------------------------------------------------------------------------------------------------------------------------------------------------------------------------------|----|--------------|----|--------------|
| 1.5.3.2  | Folic acid > GO:folic acid biosynthesis ; GO:0046656                                                                                                                                                                                                                                                 | 10 | <b>0.035</b> | 10 | 0.061        |
| 1.5.3.5  | Coenzyme A > GO:coenzyme A biosynthesis ; GO:0015937                                                                                                                                                                                                                                                 | 11 | <b>0.038</b> | 11 | 0.467        |
| 1.5.3.7  | Nicotinamide adenine dinucleotide (NAD) > GO:nicotinamide adenine dinucleotide biosynthesis ; GO:0009435                                                                                                                                                                                             | 15 | 0.142        | 15 | <b>0.025</b> |
| 1.5.4    | Fatty acid and phosphatidic acid > GO:fatty acid biosynthesis ; GO:0006633 ; GO:phosphatidic acid biosynthesis ; GO:0006654                                                                                                                                                                          | 27 | 0.319        | 27 | <b>0.020</b> |
| 1.6.1    | Phospholipid > GO:phospholipid biosynthesis ; GO:0008654                                                                                                                                                                                                                                             | 21 | <b>0.000</b> | 21 | 0.142        |
| 1.7.26   | Allantoin assimilation > GO:allantoin assimilation ; GO:0009442                                                                                                                                                                                                                                      | 8  | 0.722        | 8  | <b>0.018</b> |
| 1.7.8    | Gluconeogenesis > GO:gluconeogenesis ; GO:0006094                                                                                                                                                                                                                                                    | 17 | 0.056        | 17 | <b>0.050</b> |
| 2.3.2    | Translation > GO:protein biosynthesis ; GO:0006412                                                                                                                                                                                                                                                   | 73 | 0.543        | 73 | <b>0.021</b> |
| 2.3.8    | Ribosomal proteins > GO:structural constituent of ribosome ; GO:0003735                                                                                                                                                                                                                              | 56 | 0.241        | 56 | <b>0.028</b> |
| 3.1.2.1  | Sigma factors, anti-sigmafactors > GO:sigma factor activity ; GO:0016987 > GO:sigma factor antagonist activity ; GO:0016989                                                                                                                                                                          | 17 | <b>0.004</b> | 17 | 0.132        |
| 4.1.2    | Beta barrel porins (The Outer Membrane Porin (OMP) Functional Superfamily) > GO:porin ; GO:0015288                                                                                                                                                                                                   | 18 | <b>0.045</b> | 18 | 0.570        |
| 4.10.10  | allose/ribose > GO:allose transport ; GO:0015754 > GO:ribose transport ; GO:0015752 > GO:allose transporter activity ; GO:0015593 > GO:ribose transporter activity ; GO:0015591                                                                                                                      | 4  | <b>0.039</b> | 4  | <b>0.003</b> |
| 4.10.118 | methionine > GO:methionine transport ; GO:0015821 > GO:methionine transporter activity ; GO:0015191                                                                                                                                                                                                  | 4  | <b>0.010</b> | 4  | 0.118        |
| 4.10.119 | methylgalactoside/galactose > GO:galactose transporter activity ; GO:0005354 > GO:galactose transporter activity ; GO:0005354 > GO:methylgalactoside transporter activity ; GO:0015592 > GO:methylgalactoside transport ; GO:0015765                                                                 | 4  | 0.462        | 4  | <b>0.016</b> |
| 4.10.143 | Ni <sup>++</sup> > GO:nickel ion transport ; GO:0015675 > GO:nickel ion transporter activity ; GO:0015099                                                                                                                                                                                            | 5  | 0.343        | 5  | <b>0.032</b> |
| 4.10.148 | oligopeptide > GO:oligopeptide transport ; GO:0006857 > GO:oligopeptide transporter activity ; GO:0015198                                                                                                                                                                                            | 12 | 0.557        | 12 | <b>0.001</b> |
| 4.10.152 | peptide > GO:peptide transport ; GO:0015833 > GO:peptide transporter activity ; GO:0015197                                                                                                                                                                                                           | 12 | <b>0.025</b> | 12 | 0.060        |
| 4.10.155 | phosphate > GO:phosphate transport ; GO:0006817 > GO:phosphate transporter activity ; GO:0015114                                                                                                                                                                                                     | 7  | 0.277        | 7  | <b>0.006</b> |
| 4.10.185 | uracil > GO:uracil transport ; GO:0015857 > GO:uracil transporter activity ; GO:0015210                                                                                                                                                                                                              | 2  | 0.832        | 2  | <b>0.034</b> |
| 4.10.29  | cellobiose/arbutin/salicin > GO:salicin transport ; GO:0042948 > GO:salicin transporter activity ; GO:0042950 > GO:cellobiose transport ; GO:0019533 > GO:cellobiose transporter activity ; GO:0019191 > GO:salicin transporter activity ; GO:0042950 > GO:salicin transporter activity ; GO:0042950 | 4  | <b>0.004</b> | 4  | <b>0.027</b> |
| 4.10.48  | D-ribose > GO:ribose transport ; GO:0015752 > GO:D-ribose transporter activity ; GO:0015591                                                                                                                                                                                                          | 6  | <b>0.042</b> | 6  | 0.469        |
| 4.10.54  | Fe <sup>++</sup> > GO:ferric iron transport ; GO:0015682 > GO:ferric iron transporter activity ; GO:0015091                                                                                                                                                                                          | 2  | <b>0.025</b> | 2  | 0.955        |
| 4.10.58  | ferrichrome > GO:ferrichrome transport ; GO:0042928 > GO:ferrichrome transporter activity ; GO:0042929                                                                                                                                                                                               | 5  | 0.581        | 5  | <b>0.017</b> |
| 4.10.75  | glutamate/aspartate > GO:glutamate transport ; GO:0015813 > GO:aspartate transport ; GO:0015810 > GO:glutamate transporter activity ; GO:0005313 > GO:aspartate transporter activity ; GO:0015183                                                                                                    | 4  | 0.789        | 4  | <b>0.008</b> |
| 4.10.78  | glycerol-3-P > GO:glycerol transport ; GO:0015793 > GO:glycerol-3-phosphate transporter activity ; GO:0015169                                                                                                                                                                                        | 5  | 0.256        | 5  | <b>0.033</b> |
| 4.10.82  | H <sup>+</sup> > GO:proton transport ; GO:0015992 > GO:hydrogen ion transporter activity ; GO:0015078                                                                                                                                                                                                | 14 | 0.971        | 14 | <b>0.022</b> |
| 4.2.1.13 | The C4-Dicarboxylate Uptake (Dcu) Family > GO:C4-dicarboxylate transporter ; GO:0015556                                                                                                                                                                                                              | 2  | <b>0.045</b> | 2  | 0.209        |
| 4.2.1.21 | The Solute:Sodium Symporter (SSS) Family > GO:solute:sodium symporter ; GO:0015370                                                                                                                                                                                                                   | 4  | 0.848        | 4  | <b>0.020</b> |
| 4.2.1.40 | The Nucleobase:Cation Symporter-2 (NCS2) Family > GO:nucleobase:cation symporter ; GO:0015391                                                                                                                                                                                                        | 5  | 0.879        | 5  | <b>0.006</b> |

|           |                                                                                                                                                                                              |    |              |    |              |
|-----------|----------------------------------------------------------------------------------------------------------------------------------------------------------------------------------------------|----|--------------|----|--------------|
| 4.2.1.42  | The Aromatic Amino Acid Permease (ArAAP) Family > GO:hydroxy/aromatic amino-acid permease ; GO:0015507                                                                                       | 7  | <b>0.001</b> | 7  | 0.946        |
| 4.2.1.47  | The Divalent Anion:Na+ Symporter (DASS) Family > GO:..                                                                                                                                       | 3  | <b>0.048</b> | 3  | 0.153        |
| 4.3.1.1.1 | ATP binding component > GO:..                                                                                                                                                                | 92 | <b>0.005</b> | 92 | 0.068        |
| 4.3.1.1.3 | periplasmic binding component> GO:..                                                                                                                                                         | 51 | 0.428        | 51 | <b>0.041</b> |
| 4.4.1.3   | PTS Lactose-N,N'-Diacetylchitobiose-betaucoside (Lac) Family > GO:..                                                                                                                         | 3  | <b>0.018</b> | 3  | <b>0.016</b> |
| 4.4.1.5   | The PTS Galactitol (Gat) Family > GO:galactitol permease ; GO:0015588                                                                                                                        | 5  | <b>0.021</b> | 5  | 0.710        |
| 4.8.1.3   | MPA1 Family auxillary transport protein> GO:..                                                                                                                                               | 2  | 0.151        | 2  | <b>0.035</b> |
| 4.8.1.7   | The Phosphotransferase System Enzyme I (EI) Family> GO:..                                                                                                                                    | 7  | 0.214        | 7  | <b>0.030</b> |
| 4.9.2.22  | The Putative Permease (PerM) Family> GO:..                                                                                                                                                   | 2  | 0.680        | 2  | <b>0.034</b> |
| 5.5.4     | pH response > GO:response to pH ; GO:0009268                                                                                                                                                 | 13 | 0.394        | 13 | <b>0.033</b> |
| 5.5.6     | Other stresses (mechanical, nutritional, oxidative) > GO:response to mechanical stimulus ; GO:0009612 > GO:response to nutrients ; GO:0007584 > GO:response to oxidative stress ; GO:0006979 | 22 | 0.353        | 22 | <b>0.025</b> |
