# Supplementary material for: Perceiving molecular evolution processes in Escherichia coliby comprehensive metabolite and gene expression profiling
Source: Springer Nature journal article supplement (doi:10.1186/gb-2008-9-4-r72), 2008-04-10
Supplement: 13059_2007_1934_MOESM5_ESM.pdf [file 13059_2007_1934_MOESM5_ESM.pdf]

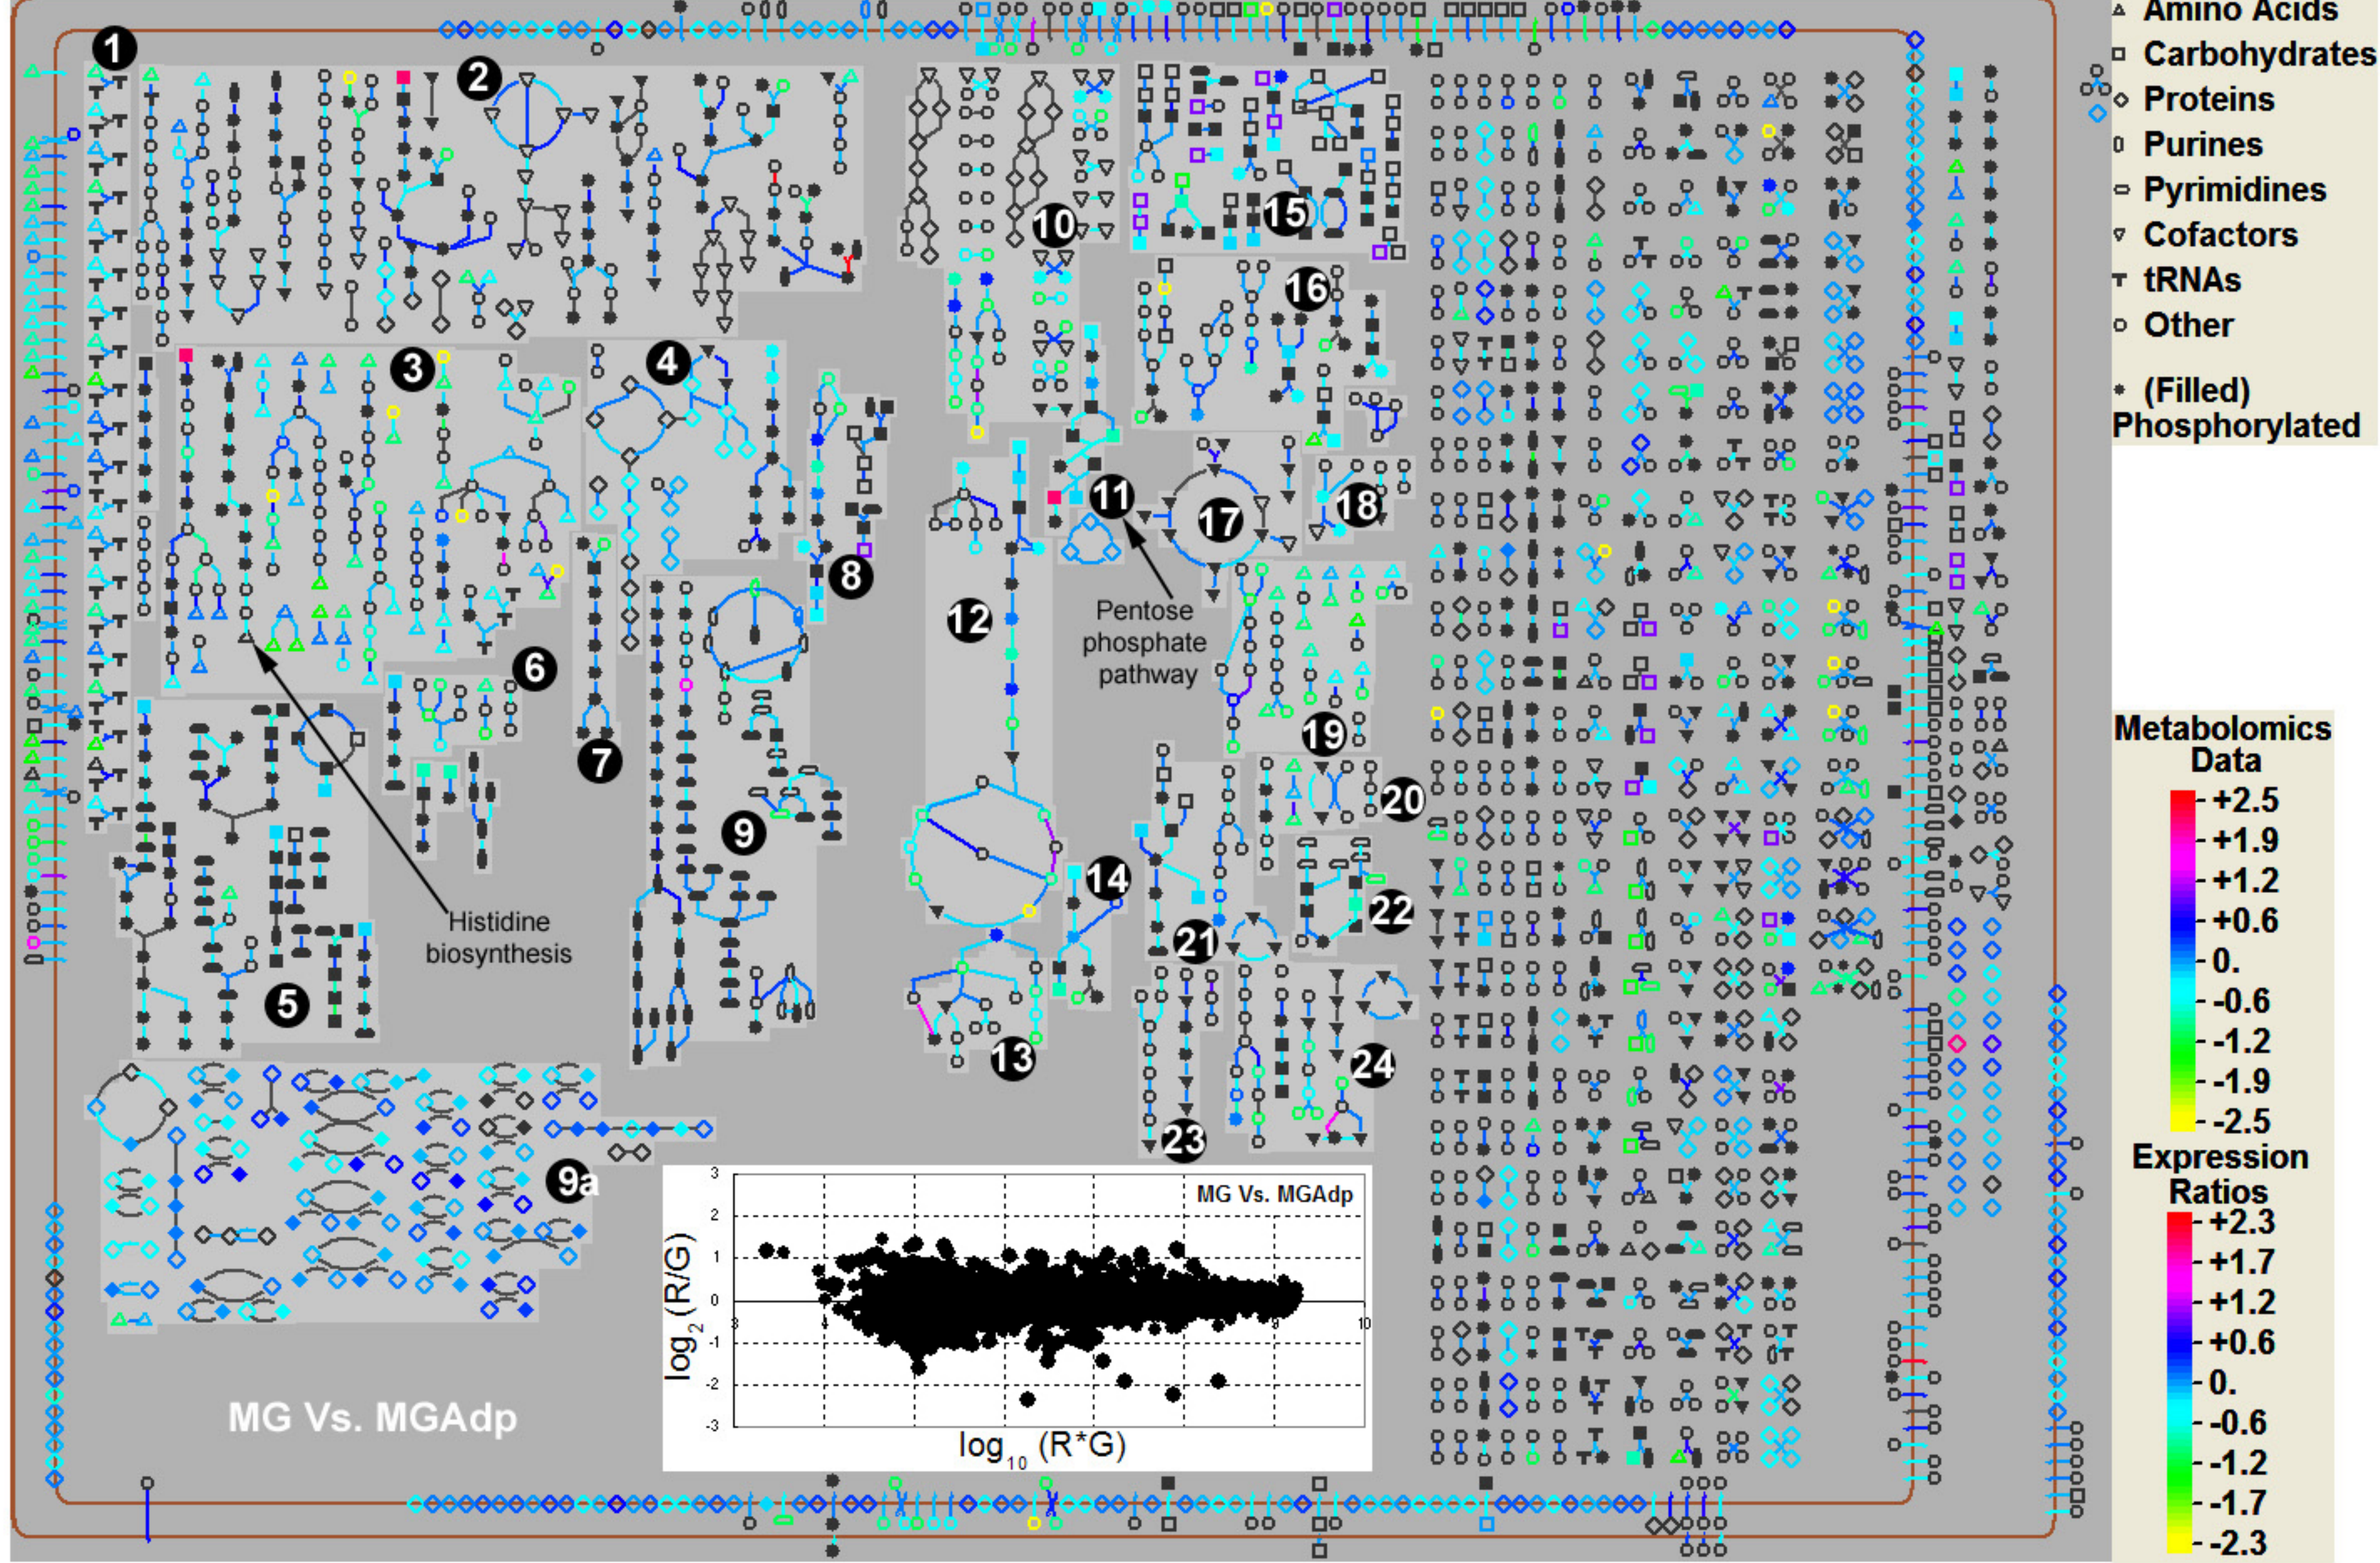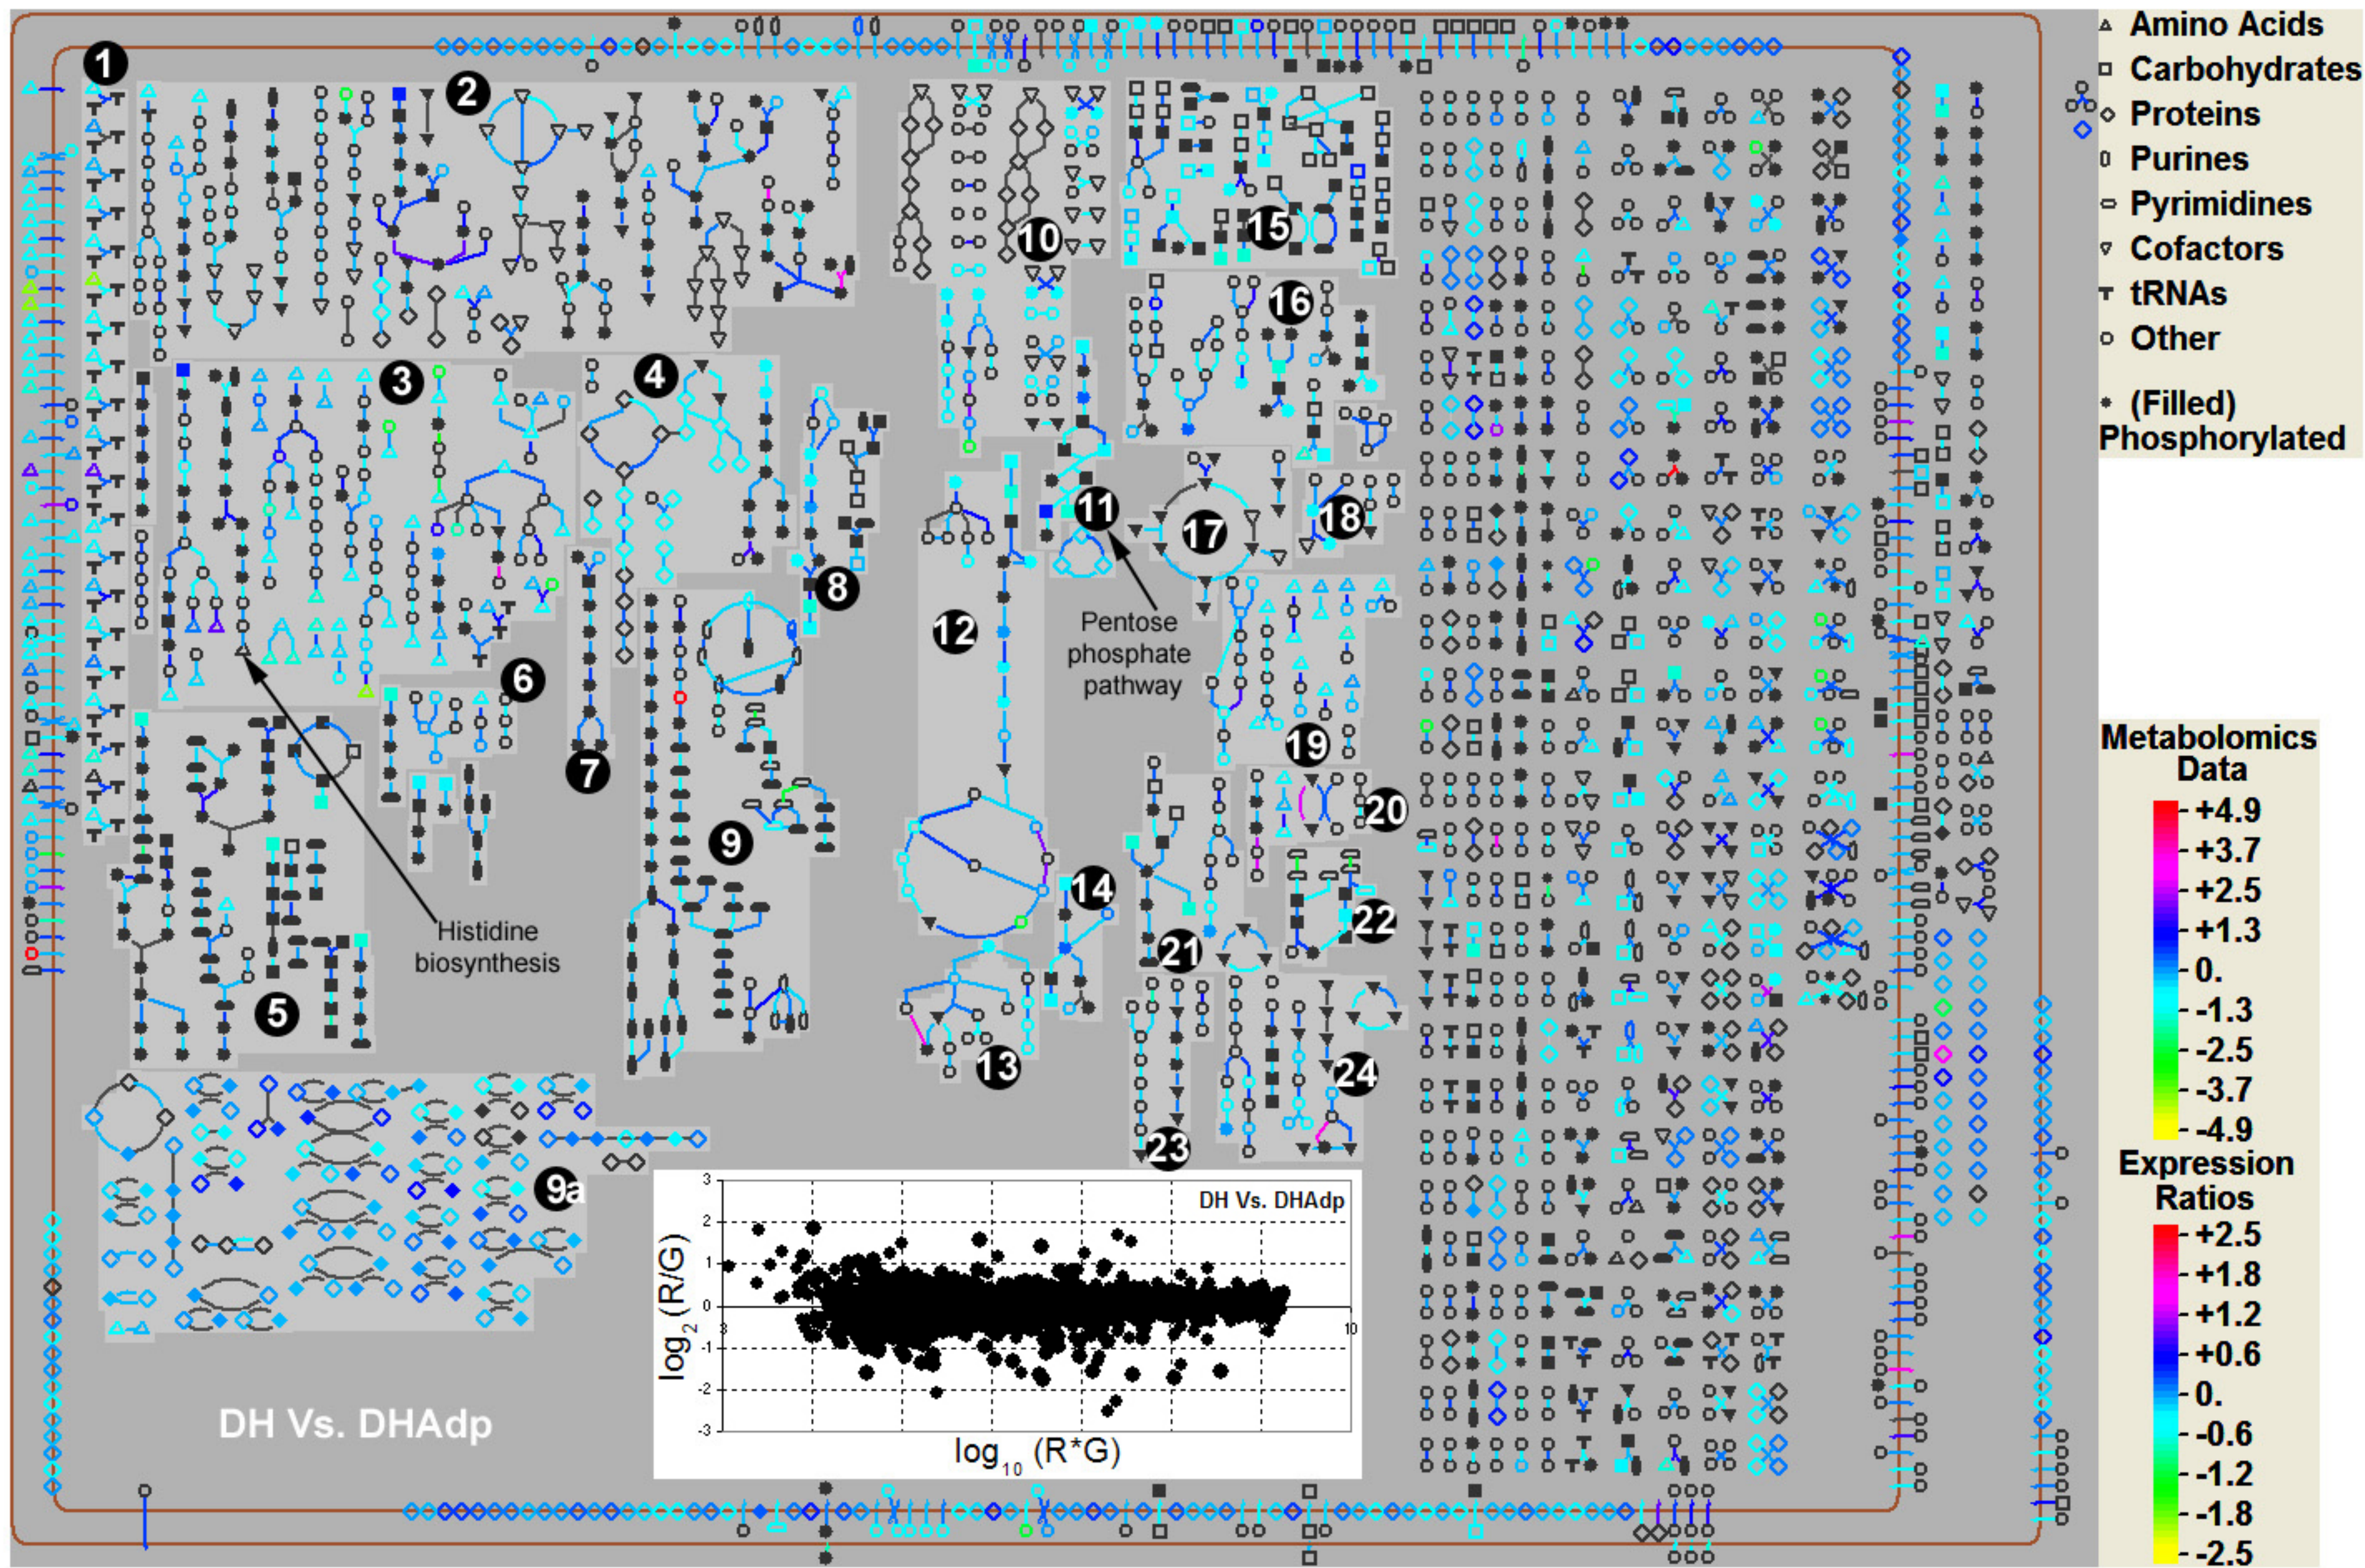

## Additional data file 5

Integration of transcriptome and metabolome data during the comparison of ancestral and evolved strains in excess-nutrient adaptive evolution (MG/MGAdp and DH/DHAdp). Metabolic overview for *E. coli* illustrating the results of high-throughput transcriptome and metabolome experiments in a global metabolic pathway context generated by Pathway Tools. Gene expression levels are mapped to reaction steps involved in a metabolism, and the range of data values levels in a given experimental dataset is mapped to a spectrum of colours according to the  $\log_2$  ratio scale on the lower right inset. Similarly, for metabolomics data, compound nodes are coloured according to the data value for the corresponding compound. The inner inset shows the ratio-intensity plot of the gene expression data displaying the  $\log_2(Ri/Gi)$  ratio for each element on the array as a function of the  $\log_{10}(Ri*Gi)$  product intensities. (1- Biosynthesis - Aminoacyl-tRNAs, 2- Biosynthesis - Cofactors, prosthetic group and electron carriers, 3- Biosynthesis - Amino acids, 4- Biosynthesis - Fattyacids and lipids, 5- Biosynthesis - Cell structure, 6- Biosynthesis - Amines and polyamines, 7- Biosynthesis - Secondary metabolites, 8- Biosynthesis - Sugars and polysaccharides, 9- Biosynthesis - Nucleosides and nucleotides, 9a- Biosynthesis -Signal transduction pathways, 10- Respiration, 11- Pentose phosphate pathway, 12- Glycolysis, 13- Fermentation, 14- Superpathway of glycolysis and Entner-Doudoroff, 15- Degradation - Sugars and polysaccharides, 16- Degradation - Sugar derivatives, 17- Degradation - Fattyacids and lipids, 18- Degradation - Alcohols, 19- Degradation - Amino acids, 20- Degradation - Inorganic nutrients, 21- Degradation - Amines and polyamines, 22- Degradation - Nucleosides and nucleotides, 23- Degradation - Aromatic compounds, 24- Degradation - Carboxylates.)
