# Supplementary material for: Perceiving molecular evolution processes in Escherichia coliby comprehensive metabolite and gene expression profiling
Source: Springer Nature journal article supplement (doi:10.1186/gb-2008-9-4-r72), 2008-04-10
Supplement: 13059_2007_1934_MOESM6_ESM.pdf [file 13059_2007_1934_MOESM6_ESM.pdf]

# Superpathway of oxidative and non-oxidative branches of pentose phosphate pathway

A) MG Vs. MG\_Adp

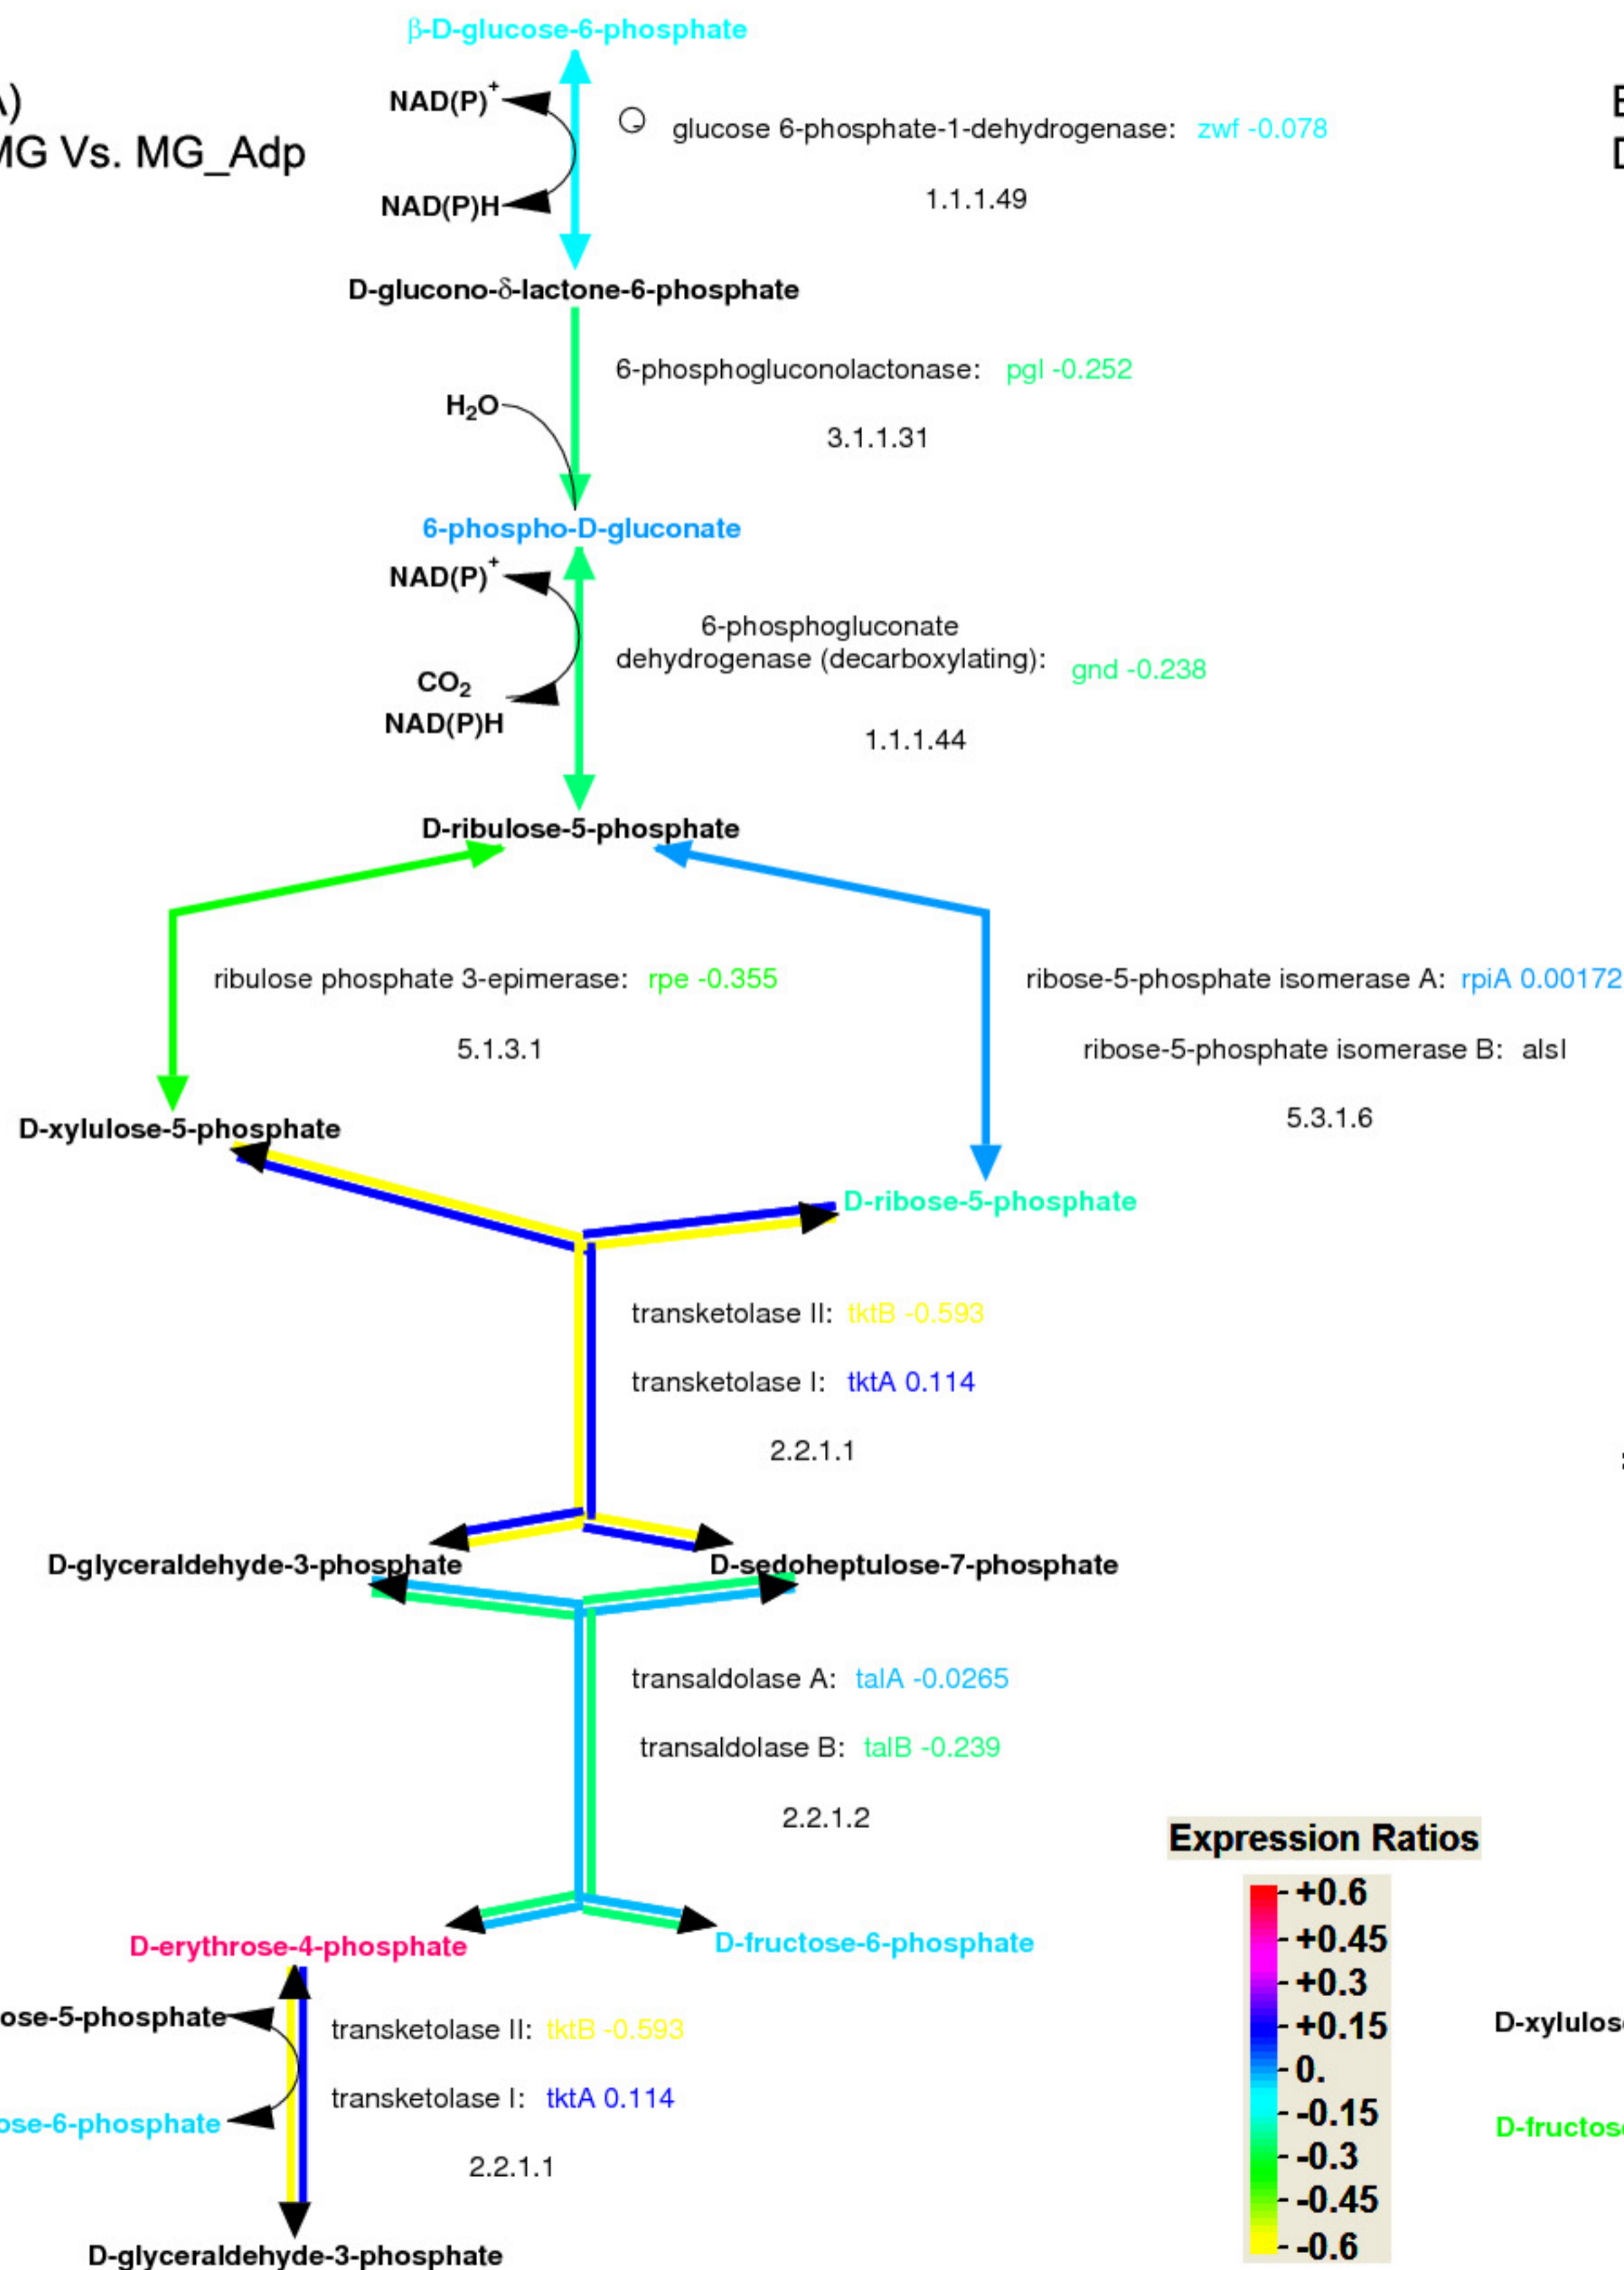

B) DH Vs. DH\_Adp

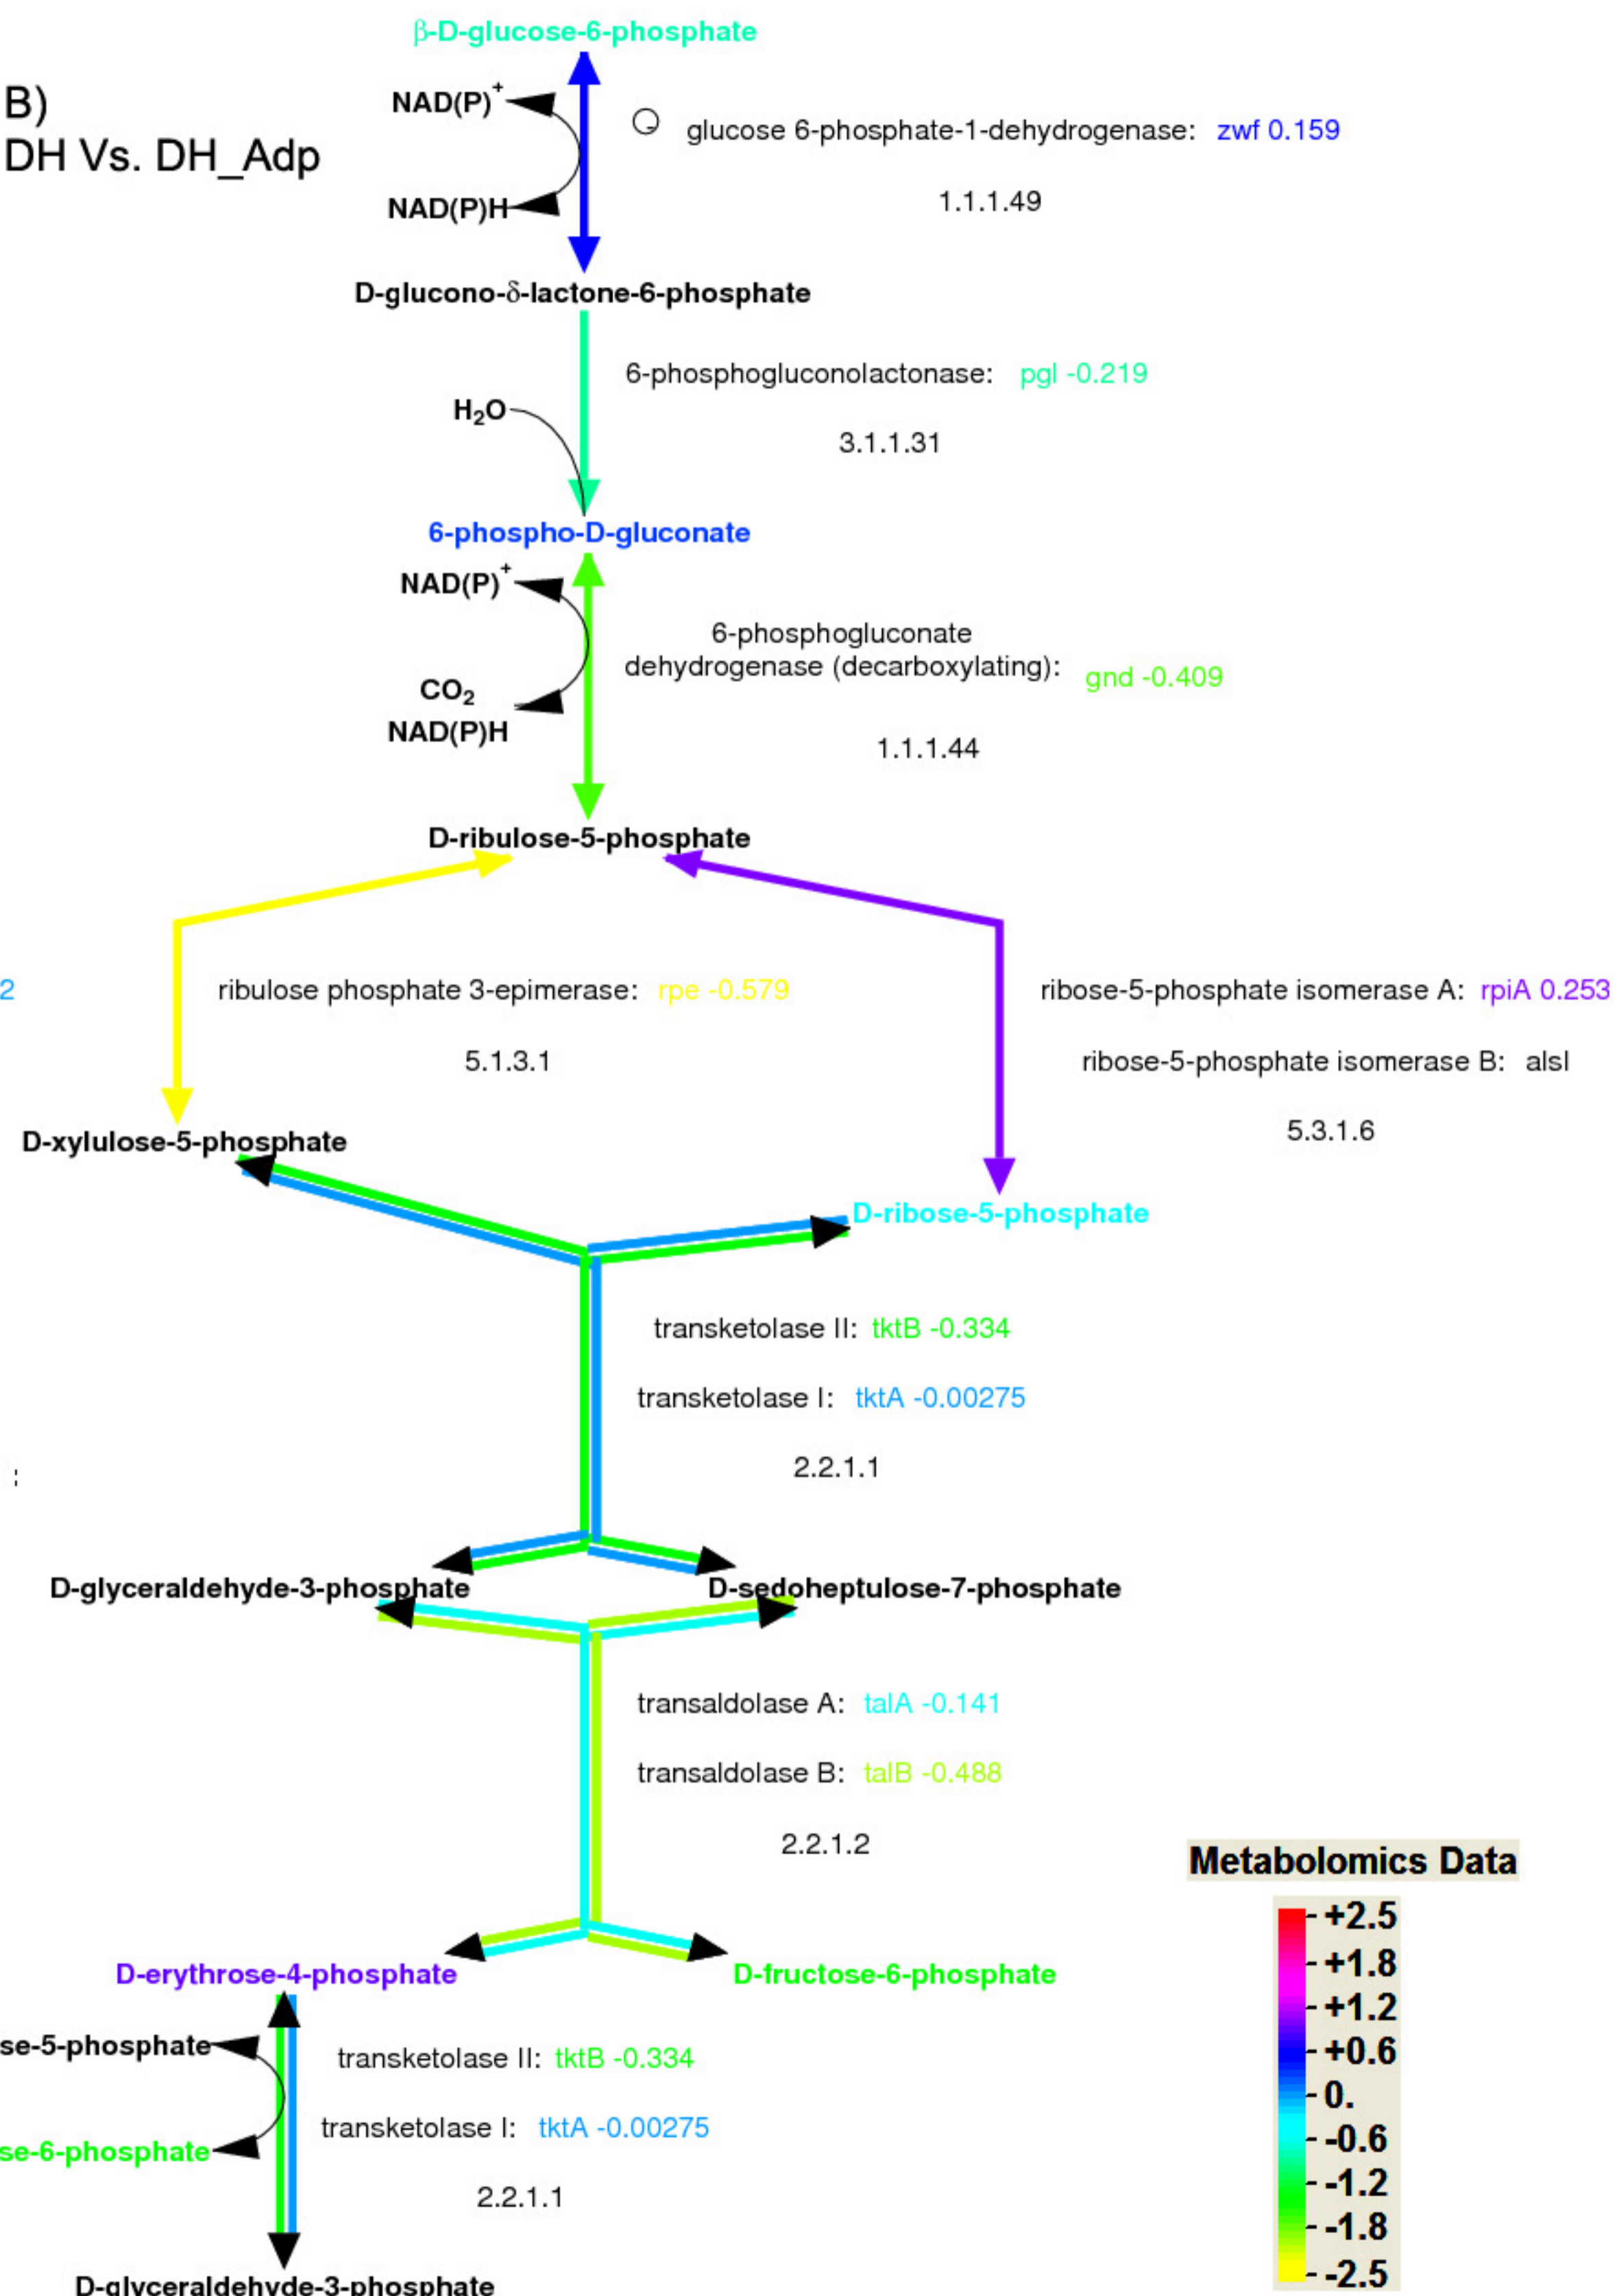

Expression Ratios

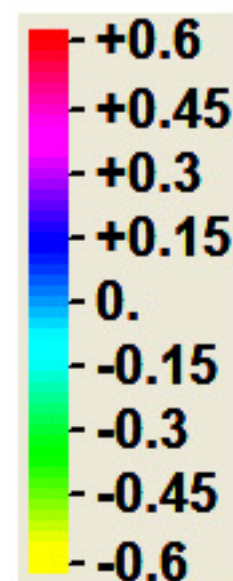

Metabolomics Data

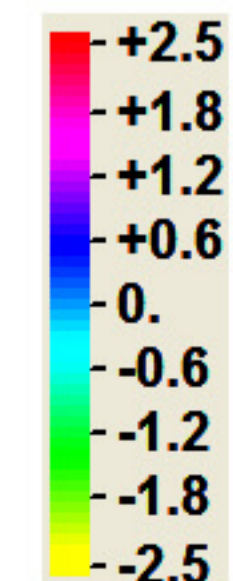

## **Additional data file 6**

Pentose phosphate pathway in excess-nutrient adapted strains. The gene expression and metabolite abundance level in evolved strains compared to their ancestor lines are shown according to the  $\log_2$  ratio scale shown in the inset (A-MG/MGAdp, B- DH/DHAdp). Reaction lines are colour-coded according to the relative values of the expression level of the gene that codes for the enzyme that catalyzes that reaction step. Metabolite names are colour-coded according to the relative abundance of the metabolite.
