# Supplementary material for: Perceiving molecular evolution processes in Escherichia coliby comprehensive metabolite and gene expression profiling
Source: Springer Nature journal article supplement (doi:10.1186/gb-2008-9-4-r72), 2008-04-10
Supplement: 13059_2007_1934_MOESM7_ESM.pdf [file 13059_2007_1934_MOESM7_ESM.pdf]

**a**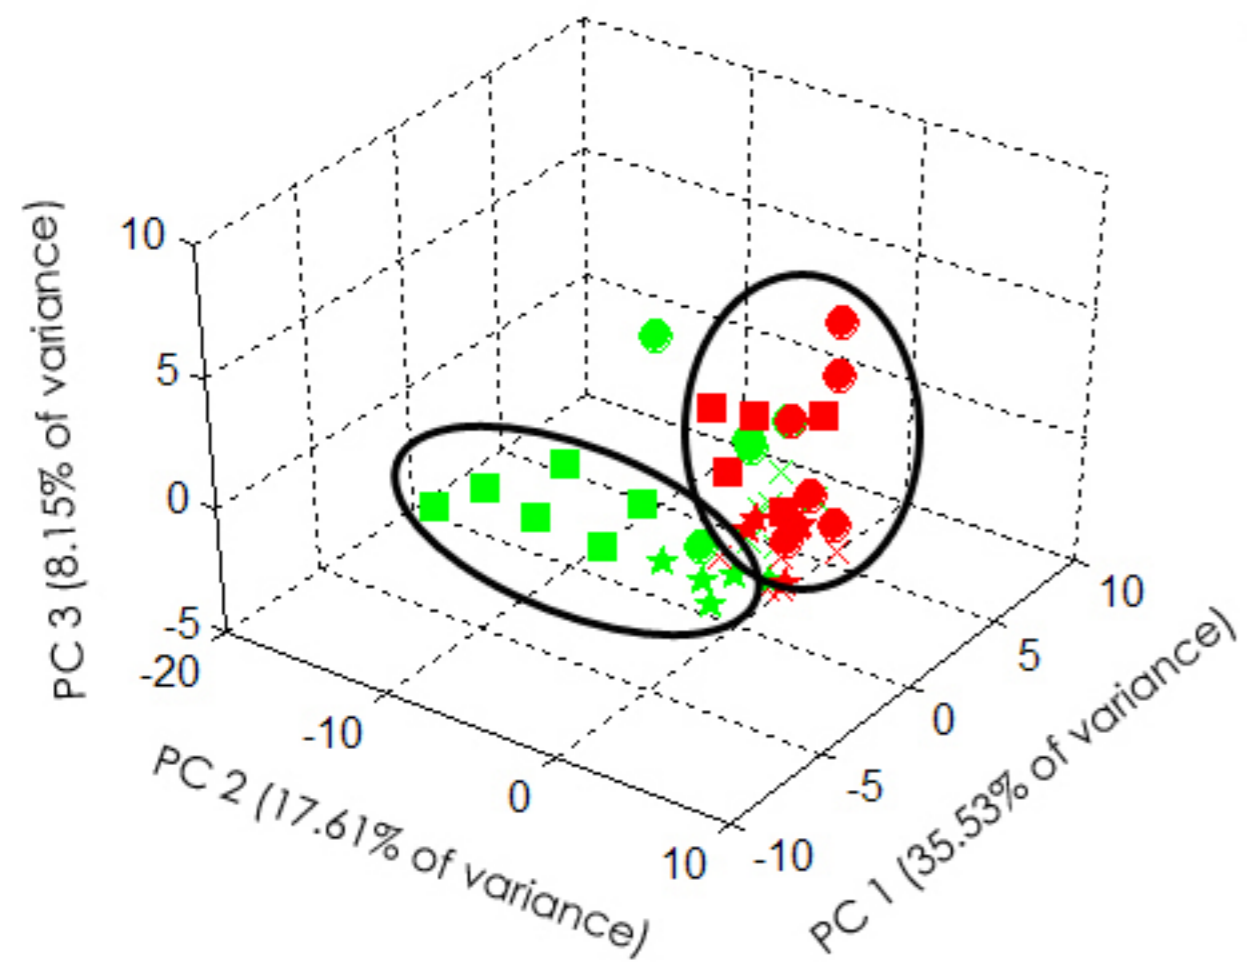**b**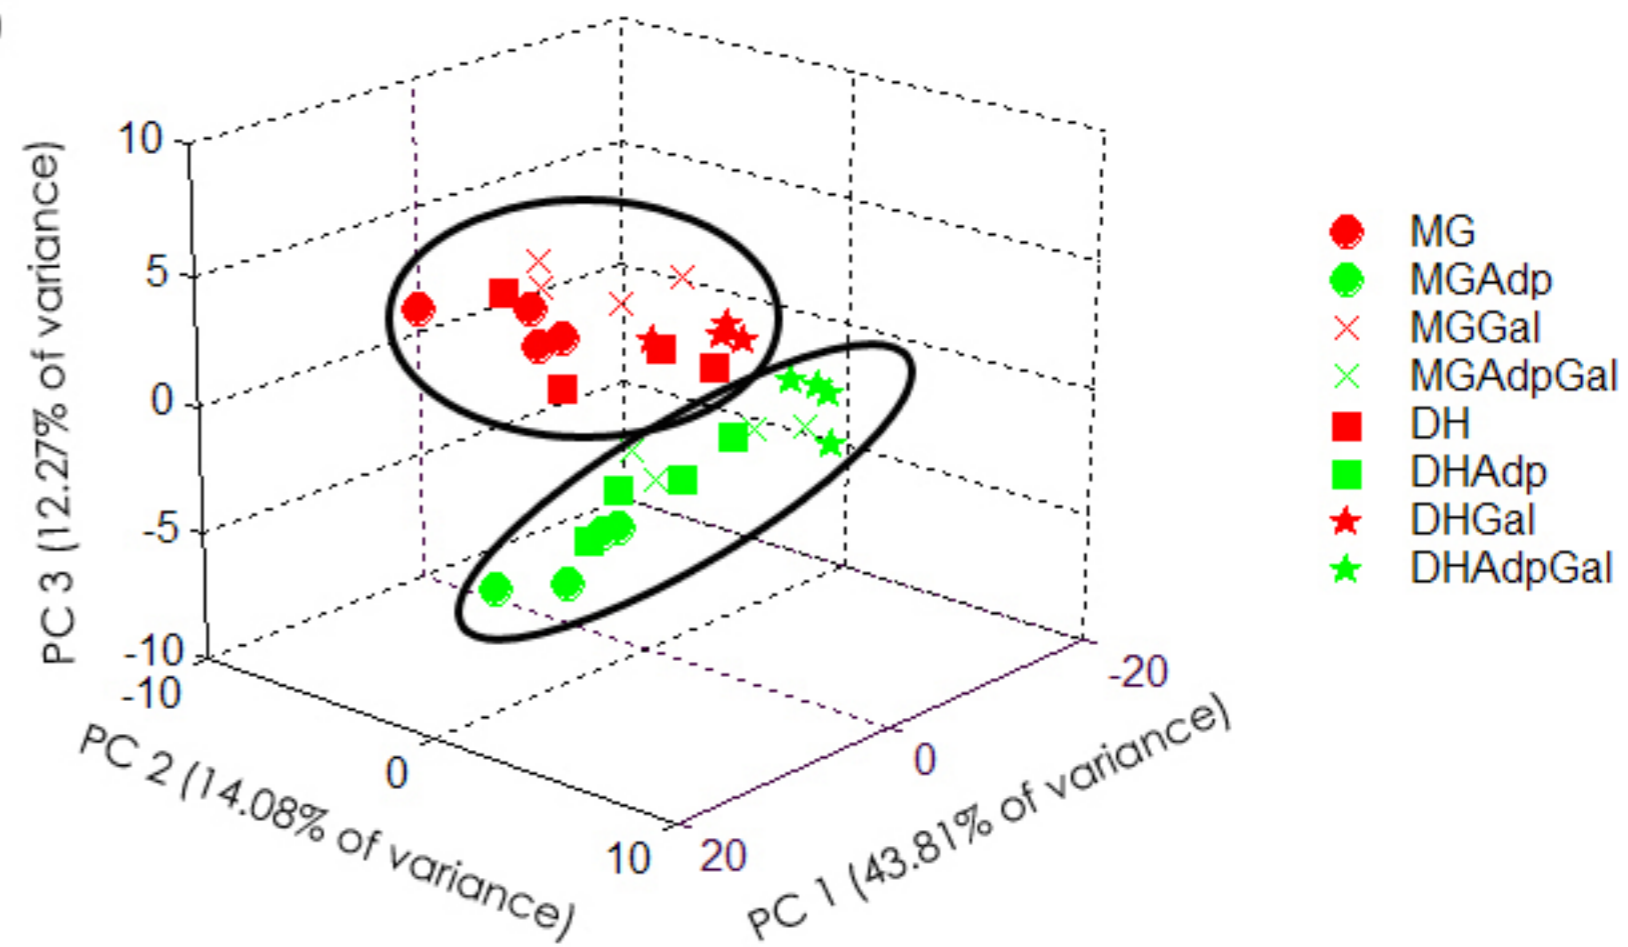

### **Additional data file 7**

PCA analyses of both the ancestors and evolved lines of both the strains grown in two different media. Each data-point represents an experimental sample plotted using the first three principal components. PCA was carried out on the log transformed mean-centred data matrix using all identified metabolites and the genes with  $P \leq 0.05$  (Student t-test) in at least one strain. Values given for each component in parentheses represents the percentage of variance.
