# Supplementary material for: Perceiving molecular evolution processes in Escherichia coliby comprehensive metabolite and gene expression profiling
Source: Springer Nature journal article supplement (doi:10.1186/gb-2008-9-4-r72), 2008-04-10
Supplement: 13059_2007_1934_MOESM8_ESM.pdf [file 13059_2007_1934_MOESM8_ESM.pdf]

| NETWORK                 | NODES | EDGES | <k>                  |                | <C>                  |                | <l>                  |                | DIAMETER             |                |
|-------------------------|-------|-------|----------------------|----------------|----------------------|----------------|----------------------|----------------|----------------------|----------------|
|                         |       |       | Coexpression network | Random network | Coexpression network | Random network | Coexpression network | Random network | Coexpression network | Random network |
| MGDHAdp                 | 4170  | 23086 | 11.070               | 11.070         | 0.049                | 0.001          | 7.193                | 5.048          | 20                   | 10             |
| MGDHAdpGal              | 4136  | 20501 | 9.910                | 9.910          | 0.051                | 0.001          | 7.157                | 5.367          | 18                   | 12             |
| MGDHStat                | 4166  | 54028 | 25.930               | 25.930         | 0.058                | 0.002          | 6.548                | 3.544          | 21                   | 6              |
| MGDHAdp Intersection    | 4168  | 27117 | 13.010               | 13.010         | 0.113                | 0.001          | 6.753                | 4.665          | 14                   | 9              |
| MGDHAdpGal Intersection | 4129  | 36976 | 17.910               | 17.910         | 0.070                | 0.001          | 6.847                | 4.037          | 16                   | 7              |
| MGDHStat Intersection   | 4141  | 85095 | 41.090               | 41.090         | 0.089                | 0.003          | 6.866                | 3.028          | 23                   | 5              |
