# Supplementary material for: Perceiving molecular evolution processes in Escherichia coliby comprehensive metabolite and gene expression profiling
Source: Springer Nature journal article supplement (doi:10.1186/gb-2008-9-4-r72), 2008-04-10
Supplement: 13059_2007_1934_MOESM11_ESM.pdf [file 13059_2007_1934_MOESM11_ESM.pdf]

**a**Sample X, Absolute value ( $\log_2$ )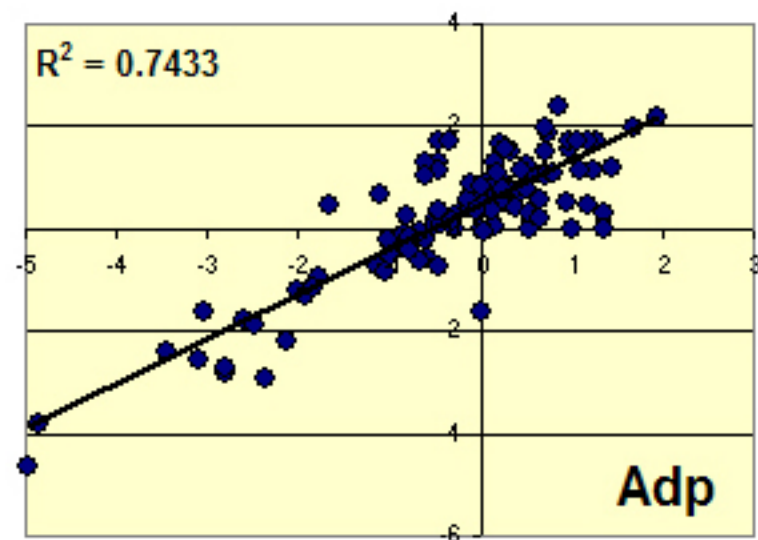Sample Y, Absolute value ( $\log_2$ )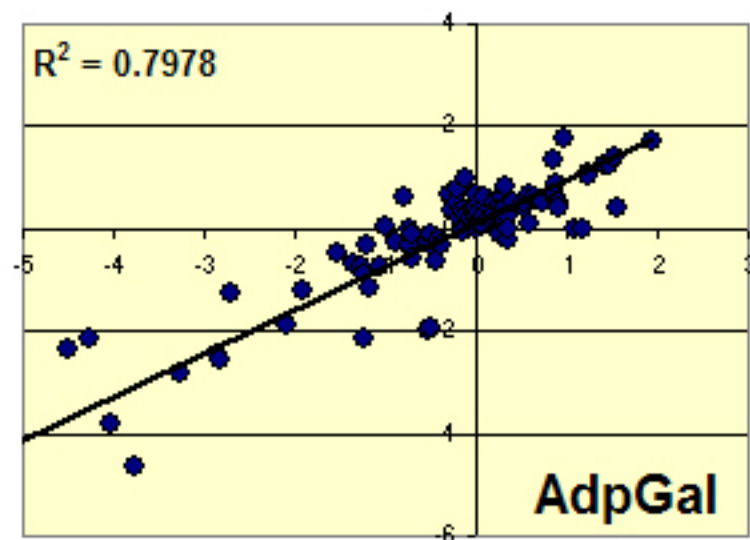Sample Y, Absolute value ( $\log_2$ )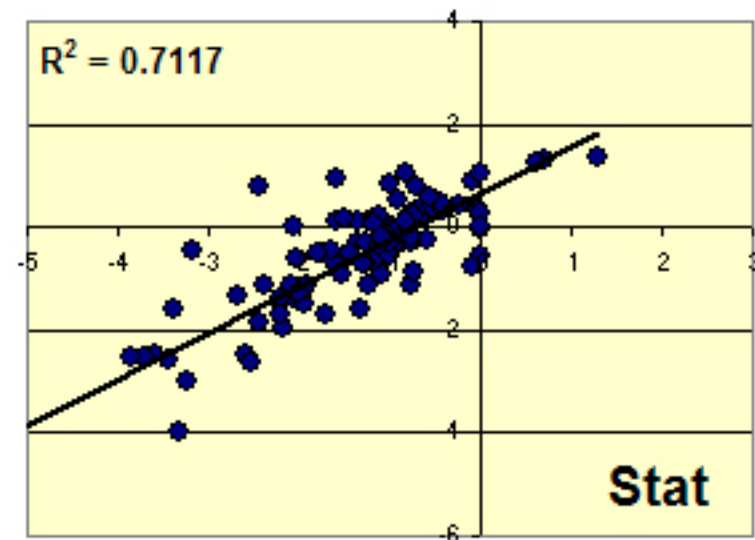Sample Y, Absolute value ( $\log_2$ )**b**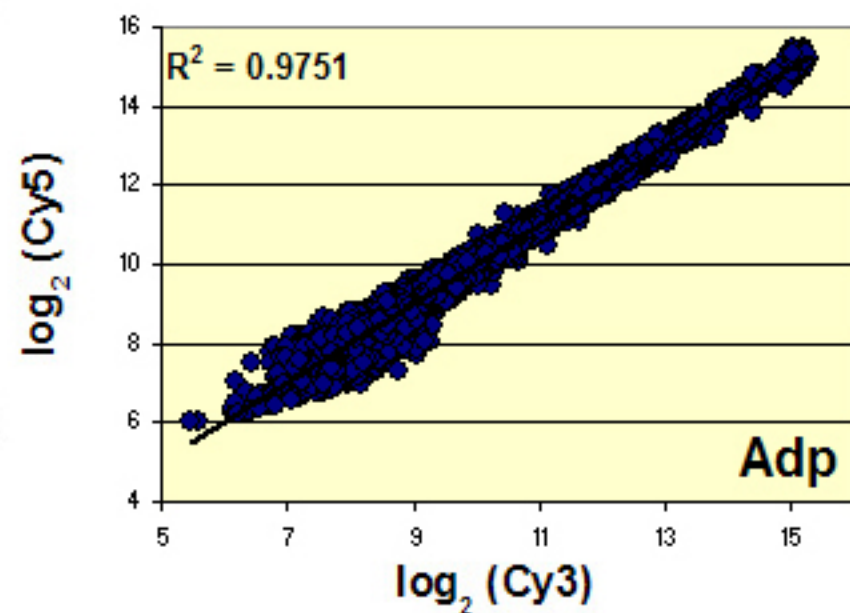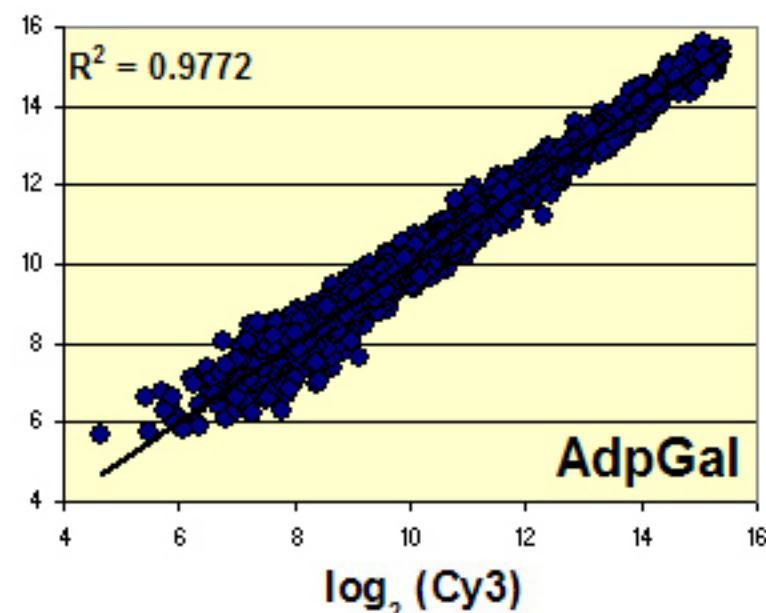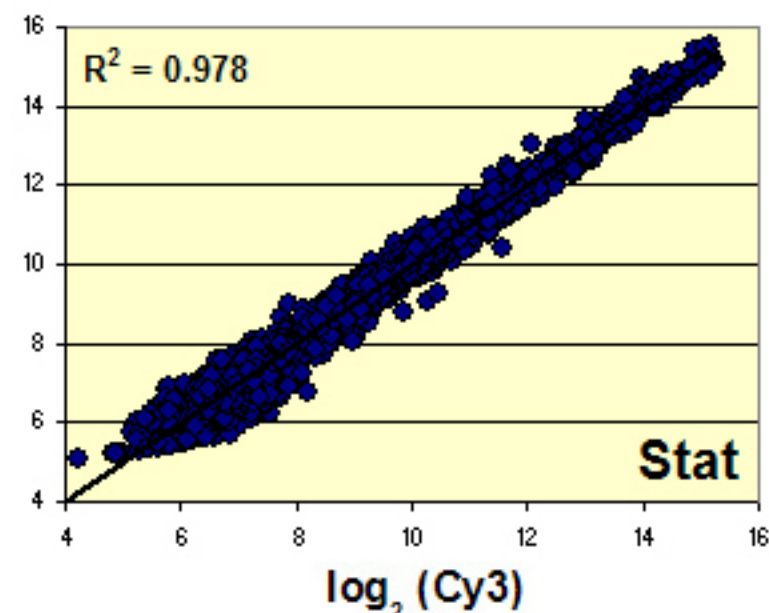

### **Additional data file 11**

Metabolite abundance level and gene expression level among the biological replicates. The metabolite abundance (a) and gene expression levels (b) among the evolved strain biological replicates indicating relatively low level of variation among the replicates used for the evolutionary studies.
